# Supplementary material
Source: ML conference proceedings conference paper supplement (https://aclanthology.org/2020.findings-emnlp.329)
Supplement: OptionalSupplementaryMaterial [file 2020.findings-emnlp.329.OptionalSupplementaryMaterial.zip]

## A Appendices

### A.1 Detailed Dataset introduction

**CNN/DailyMail** The CNN/DailyMail question answering dataset (Hermann et al., 2015) modified by Nallapati et al. (2016) is commonly used for summarization. The dataset consists of online news articles with paired human-generated summaries. For the data preprocessing, we use the non-anonymized data as See et al. (2017), which doesn’t replace named entities.

**XSUM** XSUM (Narayan et al., 2018) is a dataset consists of the articles and the single-sentence answers of the question “What is the article about?” as summary. It is more abstractive compared with CNN/DailyMail.

**PUBMED** PUBMED (Cohan et al., 2018) is drawn from scientific papers specifically medical journal articles from the PubMed Open Access Subset. We use the introduction as source document and the abstract as summary here.

**BIGPATENT** BIGPATENT (Sharma et al., 2019) consists of 1.3 million records of U.S. patent documents and the corresponding summaries are created by human. According to Cooperative Patent Classification (CPC), the dataset is divided to nine categories. One of the nine categories is chosen as a dataset in difference domain in our experiment (Category B: Performing Operations; Transporting).

**REDDIT TIFU** REDDIT TIFU (Kim et al., 2019) is a dataset with less formal posts compared with datasets mentioned above which mostly use formal documents as source. It is collected from the online discussion forum Reddit. They regard the body text as source, the title as short summary, and the TL;DR summary as long summary, thus making two sets of datasets: TIFU-short and TIFU-long. TIFU-long is used in this paper.

### A.2 Dataset statistics

The detailed dataset statistics are presented in table 1

### A.3 Experimental setup

#### A.3.1 Extractive Summarizers

We use the same training setup in (Zhong et al., 2019). We use cross entropy as loss function to train  $LSTM_{non}$  and  $Trans_{auto}$ . The hidden state dimension of LSTM in  $LSTM_{non}$  is set to 512 and the

| Datasets    | Statistics     | Topics     | Oracle | Lead-k |
|-------------|----------------|------------|--------|--------|
| CNNDM       | 2,764/123/107M | News       | 55.21  | 40.32  |
| Xsum        | 1126/60/59M    | News       | 30.41  | 16.38  |
| Pubmed      | 644/36/38M     | Scientific | 46.21  | 37.52  |
| BigPatent B | 4,812/265/262M | Patents    | 51.53  | 31.85  |
| Reddit      | 206/3.3/3.6M   | Posts      | 36.47  | 11.09  |

Table 1: Detailed statistics of five datasets. Lead- $k$  indicates ROUGE-1 F1 score of the first  $k$  sentences in the document and Oracle indicates the globally optimal combination of sentences in terms of ROUGE-1 F1 scores with ground truth, the latter represents the upper bound of extractive models.

hidden state dimension of Transformer in  $Trans_{auto}$  is 2048. We use Transformer with 8 heads.

$BERT_{non}$  and  $Trans_{non}$  is constructed according to Liu and Lapata (2019). All documents and summaries are truncated to 512 tokens when training.  $BERT_{non}$  and  $Trans_{non}$  are trained for 50000 steps, the gradient is accumulated every two steps. We use Adam as optimizer and the learning rate is set to  $2e-3$ .

$BERT_{match}$  is trained as in Zhong et al. (2020). It uses the base version of BERT as base model. We use Adam optimizer with warming up. The learning rate schedule follows Vaswani et al. (2017).

#### A.3.2 Abstractive Summarizers

$L2L$ ,  $L2L_{ptr}$  and  $L2L_{ptr}^{cov}$  are trained using the pytorch reproduced version code of See et al. (2017). We use the same size of vocabulary(50k), hidden state dimension (256) and word embedding dimension (128) as in the paper. All of three models are trained with 650000 maximum training steps, We use Adagrad to train the models with learning rate of 0.15.

$BE2T$  and  $T2T$  is constructed according to Liu and Lapata (2019). We use two separate optimizers for the decoder and encoder regarding  $BE2T$  to offset the mismatch of encoder and decoder, since the former is pre-trained while the latter is not. Learning rates for the optimizers of encoder and decoder are 0.002 and 0.2 respectively. On the other hand,  $BE2T$  and  $T2T$  are trained with gradient accumulation every five steps, training step for which is 200000.

$BART$  uses the large pre-trained sequence to sequence model in Lewis et al. (2019). The total learning step when fine-tuning is set to 20000 with 500 steps warming up. We use Adam as optimizer and learning rate is  $3e-05$ .

| Models |                        | CNNDM |       |       | XSUM  |       |       | PubMed |       |       | Bigpatent b |       |       | Reddit |       |       |
|--------|------------------------|-------|-------|-------|-------|-------|-------|--------|-------|-------|-------------|-------|-------|--------|-------|-------|
|        |                        | R1    | R2    | RL    | R1    | R2    | RL    | R1     | R2    | RL    | R1          | R2    | RL    | R1     | R2    | RL    |
| Ext.   | LSTM <sub>non</sub>    | 41.36 | 18.81 | 37.73 | 19.51 | 3.10  | 14.50 | 42.98  | 16.59 | 38.28 | 39.29       | 13.07 | 32.61 | 20.46  | 5.05  | 16.33 |
|        | Trans <sub>non</sub>   | 40.84 | 18.23 | 37.09 | 15.74 | 1.67  | 11.58 | 38.45  | 13.28 | 34.16 | 34.41       | 10.05 | 28.75 | 16.25  | 2.60  | 12.57 |
|        | Trans <sub>auto</sub>  | 41.35 | 18.77 | 37.75 | 19.29 | 2.80  | 14.21 | 42.74  | 16.34 | 38.05 | 38.76       | 12.60 | 32.17 | 18.55  | 3.44  | 14.62 |
|        | BERT <sub>non</sub>    | 42.69 | 19.88 | 38.99 | 21.76 | 4.24  | 16.00 | 38.74  | 13.62 | 34.48 | 35.85       | 11.05 | 29.97 | 21.84  | 5.21  | 17.15 |
|        | BERT <sub>match</sub>  | 44.26 | 20.58 | 40.40 | 24.97 | 4.76  | 18.48 | 41.19  | 14.91 | 36.73 | 38.89       | 12.82 | 32.48 | 25.32  | 6.16  | 20.17 |
| Abs.   | L2L                    | 32.80 | 12.84 | 30.34 | 28.31 | 8.71  | 22.30 | 27.84  | 7.45  | 25.69 | 30.46       | 9.76  | 27.61 | 16.89  | 1.24  | 13.63 |
|        | L2L <sub>ptr</sub>     | 37.06 | 15.96 | 33.74 | 29.67 | 9.58  | 23.40 | 32.04  | 10.38 | 28.97 | 31.03       | 9.92  | 25.35 | 21.32  | 4.46  | 17.14 |
|        | L2L <sub>cov ptr</sub> | 39.95 | 17.54 | 36.25 | 28.83 | 8.83  | 22.62 | 35.27  | 11.89 | 31.92 | 35.90       | 12.31 | 32.78 | 21.28  | 4.39  | 17.22 |
|        | T2T                    | 39.90 | 17.66 | 37.08 | 29.01 | 9.13  | 22.77 | 30.71  | 8.10  | 27.97 | 42.94       | 16.75 | 37.06 | 19.96  | 3.36  | 15.60 |
|        | BE2T                   | 41.34 | 18.98 | 38.41 | 38.99 | 16.64 | 31.23 | 37.11  | 13.38 | 33.72 | 43.10       | 17.11 | 37.34 | 26.66  | 7.00  | 21.21 |
|        | BART                   | 44.75 | 21.69 | 41.46 | 44.73 | 21.99 | 37.02 | 45.02  | 16.94 | 41.17 | 45.78       | 18.31 | 38.98 | 34.00  | 11.88 | 26.91 |

Table 2: Representative summarizers we have studied in this paper and their correspond performance (ROUGE-1 F1, ROUGE-2 F1, ROUGE-L F1) on different datasets.

#### A.4 In-dataset ROUGE results for all models

Tab. 2 displays in-dataset ROUGE-1 F1, ROUGE-2 F1, ROUGE-L F1 scores.

#### A.5 The ROUGE-1 F1 score difference of all model pairs which are meaningful to compare

The holistic and fine-grained results of pair-wise comparison are displayed in Tab. 5.

#### A.6 Cross-dataset factcc results of all models

The cross-dataset factcc results for abstractive models are shown in Fig. 3 and the factcc results of extractive models are demonstrated in Fig. 4.

#### A.7 Code urls

##### A.7.1 Training code urls

The models and their training code urls are listed below:

LSTM<sub>non</sub> and Trans<sub>auto</sub> are trained from the code in Zhong et al. (2019), the code url is [https://github.com/maszhongming/Effective\\_Extractive\\_Summarization](https://github.com/maszhongming/Effective_Extractive_Summarization).

We use the code from Liu and Lapata (2019) for BERT<sub>non</sub>, Trans<sub>non</sub>, BE2T and T2T. Code url is <https://github.com/nlpyang/PreSumm>.

BERT<sub>match</sub> uses the code from Zhong et al. (2020) and the code url is <https://github.com/maszhongming/MatchSum>.

L2L, L2L<sub>ptr</sub> and L2L<sub>ptr</sub><sup>cov</sup> are trained from the code of See et al. (2017), code url is [https://github.com/atulkum/pointer\\_summarizer](https://github.com/atulkum/pointer_summarizer).

We use code in fairseq (Ott et al., 2019) to fine-tune BART, the code url is <https://github.com/pytorch/fairseq/tree/master/examples/bart>.

##### A.7.2 Evaluation code urls

The evaluation metrics code urls are listed below:

We use pyrouge (<https://github.com/bheinzerling/pyrouge>) to evaluate the ROUGE performance of models.

The url for Factcc (Kryściński et al., 2019) is <https://github.com/salesforce/factCC>.

The url for other metrics for dataset bias is <https://github.com/zide05/Data-bias-metrics>.

#### References

- Arman Cohan, Franck Dernoncourt, Doo Soon Kim, Trung Bui, Seokhwan Kim, Walter Chang, and Nazli Goharian. 2018. A discourse-aware attention model for abstractive summarization of long documents. In *Proceedings of the 2018 Conference of the North American Chapter of the Association for Computational Linguistics: Human Language Technologies, Volume 2 (Short Papers)*, volume 2, pages 615–621.
- Karl Moritz Hermann, Tomas Kocisky, Edward Grefenstette, Lasse Espeholt, Will Kay, Mustafa Suleyman, and Phil Blunsom. 2015. Teaching machines to read and comprehend. In *Advances in Neural Information Processing Systems*, pages 1684–1692.
- Byeongchang Kim, Hyunwoo Kim, and Gunhee Kim. 2019. Abstractive summarization of reddit posts with multi-level memory networks. In *Proceedings of the 2019 Conference of the North American Chapter of the Association for Computational Linguistics: Human Language Technologies, Volume 1 (Long and Short Papers)*, pages 2519–2531.
- Wojciech Kryściński, Bryan McCann, Caiming Xiong, and Richard Socher. 2019. Evaluating the factual consistency of abstractive text summarization. *arXiv*, pages arXiv–1910.
- Mike Lewis, Yinhan Liu, Naman Goyal, Marjan Ghazvininejad, Abdelrahman Mohamed, Omer Levy, Ves Stoyanov, and Luke Zettlemoyer. 2019. Bart: Denoising sequence-to-sequence pre-training

| ABS models | L2L  |      |       |          |      | L2L <sub>ptr</sub> |      |       |          |      | L2L <sub>ptr</sub> <sup>conv</sup> |      |       |          |      | T2T  |      |       |          |      | BE2T |      |       |          |      | BART |      |       |          |      |      |      |      |      |      |      |
|------------|------|------|-------|----------|------|--------------------|------|-------|----------|------|------------------------------------|------|-------|----------|------|------|------|-------|----------|------|------|------|-------|----------|------|------|------|-------|----------|------|------|------|------|------|------|------|
|            | CNN  | XSUM | Pubm. | Patent B | Red. | CNN                | XSUM | Pubm. | Patent B | Red. | CNN                                | XSUM | Pubm. | Patent B | Red. | CNN  | XSUM | Pubm. | Patent B | Red. | CNN  | XSUM | Pubm. | Patent B | Red. | CNN  | XSUM | Pubm. | Patent B | Red. |      |      |      |      |      |      |
|            | avg  |      |       |          |      | avg                |      |       |          |      | avg                                |      |       |          |      | avg  |      |       |          |      | avg  |      |       |          |      | avg  |      |       |          |      |      |      |      |      |      |      |
| CNN        | 68.6 | 71.1 | 73.3  | 69.9     | 53.9 | 67.4               | 89.4 | 91.3  | 92.2     | 91.7 | 83.5                               | 89.6 | 95.9  | 94.5     | 90.9 | 96.9 | 94.6 | 94.6  | 72.4     | 75.7 | 71.5 | 71.8 | 70.5  | 72.4     | 78.7 | 83.9 | 87.7 | 92.1  | 78.7     | 84.2 | 69.9 | 77.9 | 87.4 | 84.1 | 90.2 | 81.9 |
| XSUM       | 13.4 | 23.5 | 18.1  | 13.2     | 31.0 | 19.8               | 6.3  | 17.8  | 9.0      | 8.2  | 23.2                               | 12.9 | 7.4   | 18.1     | 11.0 | 7.6  | 6.5  | 10.1  | 9.7      | 22.6 | 10.8 | 9.9  | 19.1  | 14.4     | 14.5 | 21.1 | 29.8 | 8.7   | 31.3     | 21.1 | 35.5 | 24.7 | 36.1 | 50.1 | 50.7 | 39.4 |
| Pubm.      | 61.0 | 70.0 | 62.8  | 78.6     | 46.6 | 63.8               | 77.6 | 80.7  | 81.5     | 75.1 | 85.9                               | 80.2 | 70.7  | 75.6     | 76.6 | 67.9 | 75.4 | 73.2  | 58.5     | 59.3 | 56.2 | 72.3 | 34.9  | 56.2     | 55.4 | 58.7 | 70.8 | 71.7  | 56.4     | 62.6 | 69.5 | 61.5 | 58.4 | 61.3 | 94.1 | 69.0 |
| Patent B   | 94.4 | 94.3 | 89.0  | 71.9     | 91.0 | 88.1               | 65.2 | 60.3  | 70.9     | 62.8 | 71.0                               | 66.0 | 67.0  | 63.3     | 64.6 | 61.6 | 77.4 | 66.8  | 79.2     | 81.2 | 84.4 | 68.7 | 73.9  | 77.5     | 85.4 | 88.4 | 80.3 | 66.5  | 82.0     | 80.6 | 52.1 | 53.8 | 69.0 | 47.4 | 76.8 | 63.8 |
| Red.       | 20.9 | 40.2 | 11.1  | 13.2     | 50.9 | 27.3               | 37.2 | 21.5  | 55.2     | 62.6 | 61.1                               | 47.5 | 27.4  | 23.5     | 42.9 | 49.7 | 62.2 | 41.1  | 34.8     | 35.7 | 50.6 | 44.6 | 52.5  | 43.6     | 17.2 | 25.7 | 25.1 | 30.0  | 50.3     | 29.6 | 59.6 | 30.3 | 69.1 | 49.3 | 44.2 | 54.5 |
| avg        | 51.7 | 59.8 | 50.9  | 49.4     | 54.7 | 53.3               | 55.2 | 54.3  | 61.8     | 60.1 | 65.0                               | 59.2 | 53.7  | 55.0     | 57.2 | 56.7 | 63.2 | 57.2  | 50.9     | 54.9 | 54.7 | 53.5 | 50.2  | 52.8     | 50.2 | 55.6 | 58.7 | 53.8  | 59.8     | 55.6 | 57.3 | 53.6 | 64.0 | 62.4 | 71.2 | 61.7 |

Table 3: factcc result for Abstractive models

| EXT models | LSTM <sub>non</sub> |      |       |          |      |      | Trans <sub>non</sub> |       |       |          |       |      | Trans <sub>auto</sub> |       |       |          |       |      | BERT <sub>non</sub> |      |       |          |      |      | BERT <sub>match</sub> |      |       |          |      |      |
|------------|---------------------|------|-------|----------|------|------|----------------------|-------|-------|----------|-------|------|-----------------------|-------|-------|----------|-------|------|---------------------|------|-------|----------|------|------|-----------------------|------|-------|----------|------|------|
|            | CNN                 | XSUM | Pubm. | Patent B | Red. | avg  | CNN                  | XSUM  | Pubm. | Patent B | Red.  | avg  | CNN                   | XSUM  | Pubm. | Patent B | Red.  | avg  | CNN                 | XSUM | Pubm. | Patent B | Red. | avg  | CNN                   | XSUM | Pubm. | Patent B | Red. | avg  |
| CNN        | 99.2                | 99.9 | 96.0  | 99.1     | 95.2 | 97.9 | 100.0                | 100.0 | 98.0  | 99.1     | 100.0 | 99.4 | 98.1                  | 100.0 | 91.3  | 93.5     | 100.0 | 96.6 | 99.6                | 99.9 | 97.3  | 98.2     | 98.6 | 98.7 | 99.8                  | 99.4 | 92.9  | 95.7     | 99.1 | 97.4 |
| XSUM       | 84.1                | 94.3 | 90.3  | 81.4     | 94.1 | 88.9 | 99.8                 | 100.0 | 97.4  | 98.2     | 100.0 | 99.1 | 86.8                  | 99.3  | 82.9  | 69.9     | 100.0 | 87.8 | 98.4                | 99.7 | 96.6  | 95.7     | 99.9 | 98.1 | 99.7                  | 99.5 | 93.2  | 95.1     | 98.8 | 97.3 |
| Pubm.      | 70.5                | 84.3 | 80.8  | 65.1     | 89.0 | 77.9 | 97.7                 | 98.8  | 95.1  | 94.7     | 100.0 | 97.3 | 87.5                  | 99.6  | 79.0  | 64.4     | 99.7  | 86.1 | 95.3                | 99.3 | 95.1  | 94.3     | 99.5 | 96.7 | 99.7                  | 99.2 | 93.1  | 95.2     | 99.3 | 97.3 |
| Patent B   | 86.1                | 96.0 | 90.9  | 74.1     | 96.0 | 88.6 | 98.3                 | 99.8  | 96.3  | 97.4     | 99.5  | 98.3 | 90.7                  | 99.8  | 85.5  | 68.8     | 99.7  | 88.9 | 97.0                | 99.0 | 96.0  | 94.8     | 99.1 | 97.2 | 99.7                  | 99.0 | 93.0  | 94.5     | 98.4 | 96.9 |
| Red.       | 81.0                | 92.1 | 86.9  | 64.6     | 90.2 | 83.0 | 90.3                 | 94.1  | 94.1  | 86.7     | 96.3  | 92.3 | 79.4                  | 98.7  | 79.6  | 56.4     | 98.1  | 82.5 | 97.0                | 98.9 | 95.3  | 91.9     | 98.8 | 96.4 | 99.7                  | 99.3 | 93.1  | 96.1     | 99.3 | 97.5 |
| avg        | 84.2                | 93.3 | 89.0  | 76.8     | 92.9 | 87.2 | 97.2                 | 98.6  | 96.2  | 95.2     | 99.2  | 97.3 | 88.5                  | 99.5  | 83.7  | 70.6     | 99.5  | 88.4 | 97.5                | 99.4 | 96.1  | 95.0     | 99.2 | 97.4 | 99.7                  | 99.3 | 93.0  | 95.3     | 99.0 | 97.3 |

Table 4: factcc result for Extractive models

| analysis aspect     |         |          |     |     |     |     | Architecture                                        |      |       |          |                                                           |      |      |      |                                                     |          |      |      |                                                     |      |       |          |                                                     |     |      |      |                                                     |          |      |     |                                                     |      |       |          |      |     |      |     |         |      |     |     |      |     |     |    |             |    |    |    |    |    |    |    |    |    |    |    |    |    |    |    |    |    |    |    |    |    |    |    |    |    |    |    |    |    |    |    |    |    |    |    |    |    |    |    |    |    |    |    |    |    |    |    |    |    |    |    |    |    |    |    |    |    |    |    |    |    |    |    |    |    |    |    |    |    |    |    |    |    |    |    |    |    |    |    |    |    |    |    |    |    |    |    |    |    |    |    |    |    |    |    |    |    |    |    |    |    |    |    |    |    |    |    |    |    |    |    |    |    |    |    |    |    |    |    |    |    |    |    |    |    |    |    |    |    |    |    |    |    |    |    |    |    |    |    |    |    |    |    |    |    |    |    |    |    |    |    |    |    |    |    |    |    |    |    |    |    |    |    |    |    |    |    |    |    |    |    |    |    |    |    |    |    |    |    |    |    |    |    |    |    |    |    |    |    |    |    |    |    |    |    |    |    |    |    |    |    |    |    |    |    |    |    |    |    |    |    |    |    |    |    |    |    |    |    |    |    |    |    |    |    |    |    |    |    |    |    |    |    |    |    |    |    |    |    |    |    |    |    |    |    |    |    |    |    |    |    |    |    |    |    |    |    |    |    |    |    |    |    |    |    |    |    |    |    |    |    |    |    |    |    |    |    |    |    |    |    |    |    |    |    |    |    |    |    |    |    |    |    |    |    |    |    |    |    |    |    |    |    |    |    |    |    |    |    |    |    |    |    |    |    |    |    |    |    |    |    |    |    |    |    |    |    |    |    |    |    |    |    |    |    |    |    |    |    |    |    |    |    |    |    |    |    |    |    |    |    |    |    |    |    |    |    |    |    |    |    |    |    |    |    |    |    |    |    |    |    |    |    |    |    |    |    |    |    |    |    |    |    |    |    |    |    |    |    |    |    |    |    |    |    |    |    |    |    |    |    |    |    |    |    |    |    |    |    |    |    |    |    |    |    |    |    |    |    |    |    |    |    |    |    |    |    |    |    |    |    |    |    |    |    |    |    |    |    |    |    |    |    |    |    |    |    |    |    |    |    |    |    |    |    |    |    |    |    |    |    |    |    |    |    |    |    |    |    |    |    |    |    |    |    |    |    |    |    |    |    |    |    |    |    |    |    |    |    |    |    |    |    |    |    |    |    |    |    |    |    |    |    |    |    |    |    |    |    |    |    |    |    |    |    |    |    |    |    |    |    |    |    |    |    |    |    |    |    |    |    |    |    |    |    |    |    |    |    |    |    |    |    |    |    |    |    |    |    |   |
|---------------------|---------|----------|-----|-----|-----|-----|-----------------------------------------------------|------|-------|----------|-----------------------------------------------------------|------|------|------|-----------------------------------------------------|----------|------|------|-----------------------------------------------------|------|-------|----------|-----------------------------------------------------|-----|------|------|-----------------------------------------------------|----------|------|-----|-----------------------------------------------------|------|-------|----------|------|-----|------|-----|---------|------|-----|-----|------|-----|-----|----|-------------|----|----|----|----|----|----|----|----|----|----|----|----|----|----|----|----|----|----|----|----|----|----|----|----|----|----|----|----|----|----|----|----|----|----|----|----|----|----|----|----|----|----|----|----|----|----|----|----|----|----|----|----|----|----|----|----|----|----|----|----|----|----|----|----|----|----|----|----|----|----|----|----|----|----|----|----|----|----|----|----|----|----|----|----|----|----|----|----|----|----|----|----|----|----|----|----|----|----|----|----|----|----|----|----|----|----|----|----|----|----|----|----|----|----|----|----|----|----|----|----|----|----|----|----|----|----|----|----|----|----|----|----|----|----|----|----|----|----|----|----|----|----|----|----|----|----|----|----|----|----|----|----|----|----|----|----|----|----|----|----|----|----|----|----|----|----|----|----|----|----|----|----|----|----|----|----|----|----|----|----|----|----|----|----|----|----|----|----|----|----|----|----|----|----|----|----|----|----|----|----|----|----|----|----|----|----|----|----|----|----|----|----|----|----|----|----|----|----|----|----|----|----|----|----|----|----|----|----|----|----|----|----|----|----|----|----|----|----|----|----|----|----|----|----|----|----|----|----|----|----|----|----|----|----|----|----|----|----|----|----|----|----|----|----|----|----|----|----|----|----|----|----|----|----|----|----|----|----|----|----|----|----|----|----|----|----|----|----|----|----|----|----|----|----|----|----|----|----|----|----|----|----|----|----|----|----|----|----|----|----|----|----|----|----|----|----|----|----|----|----|----|----|----|----|----|----|----|----|----|----|----|----|----|----|----|----|----|----|----|----|----|----|----|----|----|----|----|----|----|----|----|----|----|----|----|----|----|----|----|----|----|----|----|----|----|----|----|----|----|----|----|----|----|----|----|----|----|----|----|----|----|----|----|----|----|----|----|----|----|----|----|----|----|----|----|----|----|----|----|----|----|----|----|----|----|----|----|----|----|----|----|----|----|----|----|----|----|----|----|----|----|----|----|----|----|----|----|----|----|----|----|----|----|----|----|----|----|----|----|----|----|----|----|----|----|----|----|----|----|----|----|----|----|----|----|----|----|----|----|----|----|----|----|----|----|----|----|----|----|----|----|----|----|----|----|----|----|----|----|----|----|----|----|----|----|----|----|----|----|----|----|----|----|----|----|----|----|----|----|----|----|----|----|----|----|----|----|----|----|----|----|----|----|----|----|----|----|----|----|----|----|----|----|----|----|----|----|----|----|----|----|----|----|----|----|----|----|----|----|----|----|----|----|----|----|----|----|----|----|---|
| model type          |         |          |     |     |     |     | ABS                                                 |      |       |          |                                                           |      |      |      |                                                     |          |      |      |                                                     |      |       |          |                                                     |     |      |      |                                                     |          |      |     |                                                     |      |       |          |      |     |      |     |         |      |     |     |      |     |     |    |             |    |    |    |    |    |    |    |    |    |    |    |    |    |    |    |    |    |    |    |    |    |    |    |    |    |    |    |    |    |    |    |    |    |    |    |    |    |    |    |    |    |    |    |    |    |    |    |    |    |    |    |    |    |    |    |    |    |    |    |    |    |    |    |    |    |    |    |    |    |    |    |    |    |    |    |    |    |    |    |    |    |    |    |    |    |    |    |    |    |    |    |    |    |    |    |    |    |    |    |    |    |    |    |    |    |    |    |    |    |    |    |    |    |    |    |    |    |    |    |    |    |    |    |    |    |    |    |    |    |    |    |    |    |    |    |    |    |    |    |    |    |    |    |    |    |    |    |    |    |    |    |    |    |    |    |    |    |    |    |    |    |    |    |    |    |    |    |    |    |    |    |    |    |    |    |    |    |    |    |    |    |    |    |    |    |    |    |    |    |    |    |    |    |    |    |    |    |    |    |    |    |    |    |    |    |    |    |    |    |    |    |    |    |    |    |    |    |    |    |    |    |    |    |    |    |    |    |    |    |    |    |    |    |    |    |    |    |    |    |    |    |    |    |    |    |    |    |    |    |    |    |    |    |    |    |    |    |    |    |    |    |    |    |    |    |    |    |    |    |    |    |    |    |    |    |    |    |    |    |    |    |    |    |    |    |    |    |    |    |    |    |    |    |    |    |    |    |    |    |    |    |    |    |    |    |    |    |    |    |    |    |    |    |    |    |    |    |    |    |    |    |    |    |    |    |    |    |    |    |    |    |    |    |    |    |    |    |    |    |    |    |    |    |    |    |    |    |    |    |    |    |    |    |    |    |    |    |    |    |    |    |    |    |    |    |    |    |    |    |    |    |    |    |    |    |    |    |    |    |    |    |    |    |    |    |    |    |    |    |    |    |    |    |    |    |    |    |    |    |    |    |    |    |    |    |    |    |    |    |    |    |    |    |    |    |    |    |    |    |    |    |    |    |    |    |    |    |    |    |    |    |    |    |    |    |    |    |    |    |    |    |    |    |    |    |    |    |    |    |    |    |    |    |    |    |    |    |    |    |    |    |    |    |    |    |    |    |    |    |    |    |    |    |    |    |    |    |    |    |    |    |    |    |    |    |    |    |    |    |    |    |    |    |    |    |    |    |    |    |    |    |    |    |    |    |    |    |    |    |    |    |    |    |    |    |    |    |    |    |    |    |    |    |    |    |    |    |    |    |    |    |    |    |    |    |    |    |    |    |    |    |    |    |    |    |    |    |    |    |   |
| compare models      |         |          |     |     |     |     | L2L <sub>ptr</sub> vs. L2L                          |      |       |          | L2L <sub>ptr</sub> <sup>conv</sup> vs. L2L <sub>ptr</sub> |      |      |      | T2T vs. L2L                                         |          |      |      | BE2T vs. T2T                                        |      |       |          | BART vs. BE2T                                       |     |      |      | BART vs. L2L                                        |          |      |     | BART vs. T2T                                        |      |       |          |      |     |      |     |         |      |     |     |      |     |     |    |             |    |    |    |    |    |    |    |    |    |    |    |    |    |    |    |    |    |    |    |    |    |    |    |    |    |    |    |    |    |    |    |    |    |    |    |    |    |    |    |    |    |    |    |    |    |    |    |    |    |    |    |    |    |    |    |    |    |    |    |    |    |    |    |    |    |    |    |    |    |    |    |    |    |    |    |    |    |    |    |    |    |    |    |    |    |    |    |    |    |    |    |    |    |    |    |    |    |    |    |    |    |    |    |    |    |    |    |    |    |    |    |    |    |    |    |    |    |    |    |    |    |    |    |    |    |    |    |    |    |    |    |    |    |    |    |    |    |    |    |    |    |    |    |    |    |    |    |    |    |    |    |    |    |    |    |    |    |    |    |    |    |    |    |    |    |    |    |    |    |    |    |    |    |    |    |    |    |    |    |    |    |    |    |    |    |    |    |    |    |    |    |    |    |    |    |    |    |    |    |    |    |    |    |    |    |    |    |    |    |    |    |    |    |    |    |    |    |    |    |    |    |    |    |    |    |    |    |    |    |    |    |    |    |    |    |    |    |    |    |    |    |    |    |    |    |    |    |    |    |    |    |    |    |    |    |    |    |    |    |    |    |    |    |    |    |    |    |    |    |    |    |    |    |    |    |    |    |    |    |    |    |    |    |    |    |    |    |    |    |    |    |    |    |    |    |    |    |    |    |    |    |    |    |    |    |    |    |    |    |    |    |    |    |    |    |    |    |    |    |    |    |    |    |    |    |    |    |    |    |    |    |    |    |    |    |    |    |    |    |    |    |    |    |    |    |    |    |    |    |    |    |    |    |    |    |    |    |    |    |    |    |    |    |    |    |    |    |    |    |    |    |    |    |    |    |    |    |    |    |    |    |    |    |    |    |    |    |    |    |    |    |    |    |    |    |    |    |    |    |    |    |    |    |    |    |    |    |    |    |    |    |    |    |    |    |    |    |    |    |    |    |    |    |    |    |    |    |    |    |    |    |    |    |    |    |    |    |    |    |    |    |    |    |    |    |    |    |    |    |    |    |    |    |    |    |    |    |    |    |    |    |    |    |    |    |    |    |    |    |    |    |    |    |    |    |    |    |    |    |    |    |    |    |    |    |    |    |    |    |    |    |    |    |    |    |    |    |    |    |    |    |    |    |    |    |    |    |    |    |    |    |    |    |    |    |    |    |    |    |    |    |    |    |    |    |    |    |    |    |    |    |    |    |    |    |    |    |    |    |    |    |    |    |    |    |    |    |    |    |   |
| holistic analysis   |         |          |     |     |     |     | stiff.: 20.74 vs. 18.03<br>stable.: 68.63 vs. 66.93 |      |       |          | stiff.: 22.81 vs. 20.74<br>stable.: 70.71 vs. 68.63       |      |      |      | stiff.: 19.79 vs. 18.03<br>stable.: 62.12 vs. 66.93 |          |      |      | stiff.: 23.49 vs. 19.79<br>stable.: 62.93 vs. 62.12 |      |       |          | stiff.: 31.66 vs. 23.49<br>stable.: 73.83 vs. 62.93 |     |      |      | stiff.: 31.66 vs. 18.03<br>stable.: 73.83 vs. 66.93 |          |      |     | stiff.: 31.66 vs. 19.79<br>stable.: 73.83 vs. 62.12 |      |       |          |      |     |      |     |         |      |     |     |      |     |     |    |             |    |    |    |    |    |    |    |    |    |    |    |    |    |    |    |    |    |    |    |    |    |    |    |    |    |    |    |    |    |    |    |    |    |    |    |    |    |    |    |    |    |    |    |    |    |    |    |    |    |    |    |    |    |    |    |    |    |    |    |    |    |    |    |    |    |    |    |    |    |    |    |    |    |    |    |    |    |    |    |    |    |    |    |    |    |    |    |    |    |    |    |    |    |    |    |    |    |    |    |    |    |    |    |    |    |    |    |    |    |    |    |    |    |    |    |    |    |    |    |    |    |    |    |    |    |    |    |    |    |    |    |    |    |    |    |    |    |    |    |    |    |    |    |    |    |    |    |    |    |    |    |    |    |    |    |    |    |    |    |    |    |    |    |    |    |    |    |    |    |    |    |    |    |    |    |    |    |    |    |    |    |    |    |    |    |    |    |    |    |    |    |    |    |    |    |    |    |    |    |    |    |    |    |    |    |    |    |    |    |    |    |    |    |    |    |    |    |    |    |    |    |    |    |    |    |    |    |    |    |    |    |    |    |    |    |    |    |    |    |    |    |    |    |    |    |    |    |    |    |    |    |    |    |    |    |    |    |    |    |    |    |    |    |    |    |    |    |    |    |    |    |    |    |    |    |    |    |    |    |    |    |    |    |    |    |    |    |    |    |    |    |    |    |    |    |    |    |    |    |    |    |    |    |    |    |    |    |    |    |    |    |    |    |    |    |    |    |    |    |    |    |    |    |    |    |    |    |    |    |    |    |    |    |    |    |    |    |    |    |    |    |    |    |    |    |    |    |    |    |    |    |    |    |    |    |    |    |    |    |    |    |    |    |    |    |    |    |    |    |    |    |    |    |    |    |    |    |    |    |    |    |    |    |    |    |    |    |    |    |    |    |    |    |    |    |    |    |    |    |    |    |    |    |    |    |    |    |    |    |    |    |    |    |    |    |    |    |    |    |    |    |    |    |    |    |    |    |    |    |    |    |    |    |    |    |    |    |    |    |    |    |    |    |    |    |    |    |    |    |    |    |    |    |    |    |    |    |    |    |    |    |    |    |    |    |    |    |    |    |    |    |    |    |    |    |    |    |    |    |    |    |    |    |    |    |    |    |    |    |    |    |    |    |    |    |    |    |    |    |    |    |    |    |    |    |    |    |    |    |    |    |    |    |    |    |    |    |    |    |    |    |    |    |    |    |    |    |    |    |    |    |    |    |    |    |    |    |    |    |    |    |    |    |    |    |    |    |    |    |   |
| fine-grain analysis |         |          |     |     |     |     | CNN.                                                | Xsum | Pubm. | Patent b | Red.                                                      | avg  | CNN. | Xsum | Pubm.                                               | Patent b | Red. | avg  | CNN.                                                | Xsum | Pubm. | Patent b | Red.                                                | avg | CNN. | Xsum | Pubm.                                               | Patent b | Red. | avg | CNN.                                                | Xsum | Pubm. | Patent b | Red. | avg |      |     |         |      |     |     |      |     |     |    |             |    |    |    |    |    |    |    |    |    |    |    |    |    |    |    |    |    |    |    |    |    |    |    |    |    |    |    |    |    |    |    |    |    |    |    |    |    |    |    |    |    |    |    |    |    |    |    |    |    |    |    |    |    |    |    |    |    |    |    |    |    |    |    |    |    |    |    |    |    |    |    |    |    |    |    |    |    |    |    |    |    |    |    |    |    |    |    |    |    |    |    |    |    |    |    |    |    |    |    |    |    |    |    |    |    |    |    |    |    |    |    |    |    |    |    |    |    |    |    |    |    |    |    |    |    |    |    |    |    |    |    |    |    |    |    |    |    |    |    |    |    |    |    |    |    |    |    |    |    |    |    |    |    |    |    |    |    |    |    |    |    |    |    |    |    |    |    |    |    |    |    |    |    |    |    |    |    |    |    |    |    |    |    |    |    |    |    |    |    |    |    |    |    |    |    |    |    |    |    |    |    |    |    |    |    |    |    |    |    |    |    |    |    |    |    |    |    |    |    |    |    |    |    |    |    |    |    |    |    |    |    |    |    |    |    |    |    |    |    |    |    |    |    |    |    |    |    |    |    |    |    |    |    |    |    |    |    |    |    |    |    |    |    |    |    |    |    |    |    |    |    |    |    |    |    |    |    |    |    |    |    |    |    |    |    |    |    |    |    |    |    |    |    |    |    |    |    |    |    |    |    |    |    |    |    |    |    |    |    |    |    |    |    |    |    |    |    |    |    |    |    |    |    |    |    |    |    |    |    |    |    |    |    |    |    |    |    |    |    |    |    |    |    |    |    |    |    |    |    |    |    |    |    |    |    |    |    |    |    |    |    |    |    |    |    |    |    |    |    |    |    |    |    |    |    |    |    |    |    |    |    |    |    |    |    |    |    |    |    |    |    |    |    |    |    |    |    |    |    |    |    |    |    |    |    |    |    |    |    |    |    |    |    |    |    |    |    |    |    |    |    |    |    |    |    |    |    |    |    |    |    |    |    |    |    |    |    |    |    |    |    |    |    |    |    |    |    |    |    |    |    |    |    |    |    |    |    |    |    |    |    |    |    |    |    |    |    |    |    |    |    |    |    |    |    |    |    |    |    |    |    |    |    |    |    |    |    |    |    |    |    |    |    |    |    |    |    |    |    |    |    |    |    |    |    |    |    |    |    |    |    |    |    |    |    |    |    |    |    |    |    |    |    |    |    |    |    |    |    |    |    |    |    |    |    |    |    |    |    |    |    |    |    |    |    |    |    |    |    |   |
| ROUGE               | origin  | CNN.     | 43  | 05  | 13  | 32  | 15                                                  | 30   | 28    | 18       | 64                                                        | 34   | 17   | 12   | 7                                                   | 24       | 72   | 52   | 54                                                  | 54   | 14    | 02       | 14                                                  | 11  | 11   | 37   | 20                                                  | 13       | 18   | 08  | 19                                                  | 163  | 45    | 96       | 83   | 73  | 84   | 52  | 21      | 24   | 31  | 19  | 30   |     |     |    |             |    |    |    |    |    |    |    |    |    |    |    |    |    |    |    |    |    |    |    |    |    |    |    |    |    |    |    |    |    |    |    |    |    |    |    |    |    |    |    |    |    |    |    |    |    |    |    |    |    |    |    |    |    |    |    |    |    |    |    |    |    |    |    |    |    |    |    |    |    |    |    |    |    |    |    |    |    |    |    |    |    |    |    |    |    |    |    |    |    |    |    |    |    |    |    |    |    |    |    |    |    |    |    |    |    |    |    |    |    |    |    |    |    |    |    |    |    |    |    |    |    |    |    |    |    |    |    |    |    |    |    |    |    |    |    |    |    |    |    |    |    |    |    |    |    |    |    |    |    |    |    |    |    |    |    |    |    |    |    |    |    |    |    |    |    |    |    |    |    |    |    |    |    |    |    |    |    |    |    |    |    |    |    |    |    |    |    |    |    |    |    |    |    |    |    |    |    |    |    |    |    |    |    |    |    |    |    |    |    |    |    |    |    |    |    |    |    |    |    |    |    |    |    |    |    |    |    |    |    |    |    |    |    |    |    |    |    |    |    |    |    |    |    |    |    |    |    |    |    |    |    |    |    |    |    |    |    |    |    |    |    |    |    |    |    |    |    |    |    |    |    |    |    |    |    |    |    |    |    |    |    |    |    |    |    |    |    |    |    |    |    |    |    |    |    |    |    |    |    |    |    |    |    |    |    |    |    |    |    |    |    |    |    |    |    |    |    |    |    |    |    |    |    |    |    |    |    |    |    |    |    |    |    |    |    |    |    |    |    |    |    |    |    |    |    |    |    |    |    |    |    |    |    |    |    |    |    |    |    |    |    |    |    |    |    |    |    |    |    |    |    |    |    |    |    |    |    |    |    |    |    |    |    |    |    |    |    |    |    |    |    |    |    |    |    |    |    |    |    |    |    |    |    |    |    |    |    |    |    |    |    |    |    |    |    |    |    |    |    |    |    |    |    |    |    |    |    |    |    |    |    |    |    |    |    |    |    |    |    |    |    |    |    |    |    |    |    |    |    |    |    |    |    |    |    |    |    |    |    |    |    |    |    |    |    |    |    |    |    |    |    |    |    |    |    |    |    |    |    |    |    |    |    |    |    |    |    |    |    |    |    |    |    |    |    |    |    |    |    |    |    |    |    |    |    |    |    |    |    |    |    |    |    |    |    |    |    |    |    |    |    |    |    |    |    |    |    |    |    |    |    |    |    |    |    |    |    |    |    |    |    |    |    |    |    |    |    |    |    |   |
|                     |         | Xsum     | 34  | 14  | 54  | 32  | 81                                                  | 25   | 48    | 48       | 48                                                        | 45   | 24   | 01   | 4                                                   | 07       | 54   | 55   | 48                                                  | 49   | 12    | 160      | 32                                                  | 43  | 55   | 43   | 57                                                  | 40       | 74   | 57  | 58                                                  | 67   | 147   | 40       | 51   | 98  | 103  | 97  | 64      | 164  | 106 | 141 | 116  | 116 |     |    |             |    |    |    |    |    |    |    |    |    |    |    |    |    |    |    |    |    |    |    |    |    |    |    |    |    |    |    |    |    |    |    |    |    |    |    |    |    |    |    |    |    |    |    |    |    |    |    |    |    |    |    |    |    |    |    |    |    |    |    |    |    |    |    |    |    |    |    |    |    |    |    |    |    |    |    |    |    |    |    |    |    |    |    |    |    |    |    |    |    |    |    |    |    |    |    |    |    |    |    |    |    |    |    |    |    |    |    |    |    |    |    |    |    |    |    |    |    |    |    |    |    |    |    |    |    |    |    |    |    |    |    |    |    |    |    |    |    |    |    |    |    |    |    |    |    |    |    |    |    |    |    |    |    |    |    |    |    |    |    |    |    |    |    |    |    |    |    |    |    |    |    |    |    |    |    |    |    |    |    |    |    |    |    |    |    |    |    |    |    |    |    |    |    |    |    |    |    |    |    |    |    |    |    |    |    |    |    |    |    |    |    |    |    |    |    |    |    |    |    |    |    |    |    |    |    |    |    |    |    |    |    |    |    |    |    |    |    |    |    |    |    |    |    |    |    |    |    |    |    |    |    |    |    |    |    |    |    |    |    |    |    |    |    |    |    |    |    |    |    |    |    |    |    |    |    |    |    |    |    |    |    |    |    |    |    |    |    |    |    |    |    |    |    |    |    |    |    |    |    |    |    |    |    |    |    |    |    |    |    |    |    |    |    |    |    |    |    |    |    |    |    |    |    |    |    |    |    |    |    |    |    |    |    |    |    |    |    |    |    |    |    |    |    |    |    |    |    |    |    |    |    |    |    |    |    |    |    |    |    |    |    |    |    |    |    |    |    |    |    |    |    |    |    |    |    |    |    |    |    |    |    |    |    |    |    |    |    |    |    |    |    |    |    |    |    |    |    |    |    |    |    |    |    |    |    |    |    |    |    |    |    |    |    |    |    |    |    |    |    |    |    |    |    |    |    |    |    |    |    |    |    |    |    |    |    |    |    |    |    |    |    |    |    |    |    |    |    |    |    |    |    |    |    |    |    |    |    |    |    |    |    |    |    |    |    |    |    |    |    |    |    |    |    |    |    |    |    |    |    |    |    |    |    |    |    |    |    |    |    |    |    |    |    |    |    |    |    |    |    |    |    |    |    |    |    |    |    |    |    |    |    |    |    |    |    |    |    |    |    |    |    |    |    |    |    |    |    |    |    |    |    |    |    |    |    |    |    |    |    |    |    |    |    |    |    |    |    |    |    |   |
|                     |         | Pubm.    | 103 | 23  | 42  | 30  | 26                                                  | 45   | 45    | 17       | 32                                                        | 34   | 27   | 31   | 16                                                  | 15       | 45   | 28   | 28                                                  | 21   | 16    | 67       | 33                                                  | 74  | 41   | 61   | 52                                                  | 164      | 32   | 74  | 41                                                  | 61   | 52    | 224      | 108  | 163 | 87   | 159 | 208     | 123  | 135 | 74  | 159  |     |     |    |             |    |    |    |    |    |    |    |    |    |    |    |    |    |    |    |    |    |    |    |    |    |    |    |    |    |    |    |    |    |    |    |    |    |    |    |    |    |    |    |    |    |    |    |    |    |    |    |    |    |    |    |    |    |    |    |    |    |    |    |    |    |    |    |    |    |    |    |    |    |    |    |    |    |    |    |    |    |    |    |    |    |    |    |    |    |    |    |    |    |    |    |    |    |    |    |    |    |    |    |    |    |    |    |    |    |    |    |    |    |    |    |    |    |    |    |    |    |    |    |    |    |    |    |    |    |    |    |    |    |    |    |    |    |    |    |    |    |    |    |    |    |    |    |    |    |    |    |    |    |    |    |    |    |    |    |    |    |    |    |    |    |    |    |    |    |    |    |    |    |    |    |    |    |    |    |    |    |    |    |    |    |    |    |    |    |    |    |    |    |    |    |    |    |    |    |    |    |    |    |    |    |    |    |    |    |    |    |    |    |    |    |    |    |    |    |    |    |    |    |    |    |    |    |    |    |    |    |    |    |    |    |    |    |    |    |    |    |    |    |    |    |    |    |    |    |    |    |    |    |    |    |    |    |    |    |    |    |    |    |    |    |    |    |    |    |    |    |    |    |    |    |    |    |    |    |    |    |    |    |    |    |    |    |    |    |    |    |    |    |    |    |    |    |    |    |    |    |    |    |    |    |    |    |    |    |    |    |    |    |    |    |    |    |    |    |    |    |    |    |    |    |    |    |    |    |    |    |    |    |    |    |    |    |    |    |    |    |    |    |    |    |    |    |    |    |    |    |    |    |    |    |    |    |    |    |    |    |    |    |    |    |    |    |    |    |    |    |    |    |    |    |    |    |    |    |    |    |    |    |    |    |    |    |    |    |    |    |    |    |    |    |    |    |    |    |    |    |    |    |    |    |    |    |    |    |    |    |    |    |    |    |    |    |    |    |    |    |    |    |    |    |    |    |    |    |    |    |    |    |    |    |    |    |    |    |    |    |    |    |    |    |    |    |    |    |    |    |    |    |    |    |    |    |    |    |    |    |    |    |    |    |    |    |    |    |    |    |    |    |    |    |    |    |    |    |    |    |    |    |    |    |    |    |    |    |    |    |    |    |    |    |    |    |    |    |    |    |    |    |    |    |    |    |    |    |    |    |    |    |    |    |    |    |    |    |    |    |    |    |    |    |    |    |    |    |    |    |    |    |    |    |    |    |    |    |    |    |    |    |    |    |    |    |    |    |    |    |    |    |   |
|                     |         | Patent b | 11  | -11 | 25  | 06  | 43                                                  | 03   | 10    | 28       | 22                                                        | 30   | 40   | 08   | 22                                                  | 12       | 25   | 38   | 118                                                 | 40   | 29    | 1        | 04                                                  | 38  | 02   | 24   | 12                                                  | 176      | 120  | 42  | 27                                                  | 79   | 162   | 103      | 154  | 102 | 167  | 167 | 163     | 146  | 29  | 163 | 158  |     |     |    |             |    |    |    |    |    |    |    |    |    |    |    |    |    |    |    |    |    |    |    |    |    |    |    |    |    |    |    |    |    |    |    |    |    |    |    |    |    |    |    |    |    |    |    |    |    |    |    |    |    |    |    |    |    |    |    |    |    |    |    |    |    |    |    |    |    |    |    |    |    |    |    |    |    |    |    |    |    |    |    |    |    |    |    |    |    |    |    |    |    |    |    |    |    |    |    |    |    |    |    |    |    |    |    |    |    |    |    |    |    |    |    |    |    |    |    |    |    |    |    |    |    |    |    |    |    |    |    |    |    |    |    |    |    |    |    |    |    |    |    |    |    |    |    |    |    |    |    |    |    |    |    |    |    |    |    |    |    |    |    |    |    |    |    |    |    |    |    |    |    |    |    |    |    |    |    |    |    |    |    |    |    |    |    |    |    |    |    |    |    |    |    |    |    |    |    |    |    |    |    |    |    |    |    |    |    |    |    |    |    |    |    |    |    |    |    |    |    |    |    |    |    |    |    |    |    |    |    |    |    |    |    |    |    |    |    |    |    |    |    |    |    |    |    |    |    |    |    |    |    |    |    |    |    |    |    |    |    |    |    |    |    |    |    |    |    |    |    |    |    |    |    |    |    |    |    |    |    |    |    |    |    |    |    |    |    |    |    |    |    |    |    |    |    |    |    |    |    |    |    |    |    |    |    |    |    |    |    |    |    |    |    |    |    |    |    |    |    |    |    |    |    |    |    |    |    |    |    |    |    |    |    |    |    |    |    |    |    |    |    |    |    |    |    |    |    |    |    |    |    |    |    |    |    |    |    |    |    |    |    |    |    |    |    |    |    |    |    |    |    |    |    |    |    |    |    |    |    |    |    |    |    |    |    |    |    |    |    |    |    |    |    |    |    |    |    |    |    |    |    |    |    |    |    |    |    |    |    |    |    |    |    |    |    |    |    |    |    |    |    |    |    |    |    |    |    |    |    |    |    |    |    |    |    |    |    |    |    |    |    |    |    |    |    |    |    |    |    |    |    |    |    |    |    |    |    |    |    |    |    |    |    |    |    |    |    |    |    |    |    |    |    |    |    |    |    |    |    |    |    |    |    |    |    |    |    |    |    |    |    |    |    |    |    |    |    |    |    |    |    |    |    |    |    |    |    |    |    |    |    |    |    |    |    |    |    |    |    |    |    |    |    |    |    |    |    |    |    |    |    |    |    |    |    |    |    |    |    |    |    |    |    |    |    |    |    |    |    |    |    |   |
|                     |         | Red.     | 22  | 31  | 26  | 29  | 44                                                  | 38   | 13    | 18       | 65                                                        | 69   | 40   | 35   | 20                                                  | 01       | 49   | 47   | 33                                                  | 07   | 56    | 35       | 79                                                  | 70  | 67   | 61   | 177                                                 | 100      | 165  | 163 | 86                                                  | 154  | 253   | 127      | 255  | 207 | 164  | 203 | 232     | 125  | 264 | 211 | 132  | 198 |     |    |             |    |    |    |    |    |    |    |    |    |    |    |    |    |    |    |    |    |    |    |    |    |    |    |    |    |    |    |    |    |    |    |    |    |    |    |    |    |    |    |    |    |    |    |    |    |    |    |    |    |    |    |    |    |    |    |    |    |    |    |    |    |    |    |    |    |    |    |    |    |    |    |    |    |    |    |    |    |    |    |    |    |    |    |    |    |    |    |    |    |    |    |    |    |    |    |    |    |    |    |    |    |    |    |    |    |    |    |    |    |    |    |    |    |    |    |    |    |    |    |    |    |    |    |    |    |    |    |    |    |    |    |    |    |    |    |    |    |    |    |    |    |    |    |    |    |    |    |    |    |    |    |    |    |    |    |    |    |    |    |    |    |    |    |    |    |    |    |    |    |    |    |    |    |    |    |    |    |    |    |    |    |    |    |    |    |    |    |    |    |    |    |    |    |    |    |    |    |    |    |    |    |    |    |    |    |    |    |    |    |    |    |    |    |    |    |    |    |    |    |    |    |    |    |    |    |    |    |    |    |    |    |    |    |    |    |    |    |    |    |    |    |    |    |    |    |    |    |    |    |    |    |    |    |    |    |    |    |    |    |    |    |    |    |    |    |    |    |    |    |    |    |    |    |    |    |    |    |    |    |    |    |    |    |    |    |    |    |    |    |    |    |    |    |    |    |    |    |    |    |    |    |    |    |    |    |    |    |    |    |    |    |    |    |    |    |    |    |    |    |    |    |    |    |    |    |    |    |    |    |    |    |    |    |    |    |    |    |    |    |    |    |    |    |    |    |    |    |    |    |    |    |    |    |    |    |    |    |    |    |    |    |    |    |    |    |    |    |    |    |    |    |    |    |    |    |    |    |    |    |    |    |    |    |    |    |    |    |    |    |    |    |    |    |    |    |    |    |    |    |    |    |    |    |    |    |    |    |    |    |    |    |    |    |    |    |    |    |    |    |    |    |    |    |    |    |    |    |    |    |    |    |    |    |    |    |    |    |    |    |    |    |    |    |    |    |    |    |    |    |    |    |    |    |    |    |    |    |    |    |    |    |    |    |    |    |    |    |    |    |    |    |    |    |    |    |    |    |    |    |    |    |    |    |    |    |    |    |    |    |    |    |    |    |    |    |    |    |    |    |    |    |    |    |    |    |    |    |    |    |    |    |    |    |    |    |    |    |    |    |    |    |    |    |    |    |    |    |    |    |    |    |    |    |    |    |    |    |    |    |    |    |    |    |    |    |    |    |    |    |   |
|                     | avg     | 42       | 12  | 36  | 28  | 17  | 27                                                  | 22   | 11    | 28       | 32                                                        | 12   | 10   | 21   | 25                                                  | 08       | 15   | 33   | 20                                                  | 18   | 34    | 34       | 41                                                  | 43  | 33   | 37   | 115                                                 | 80       | 93   | 45  | 54                                                  | 82   | 174   | 113      | 144  | 139 | 100  | 136 | 149     | 115  | 154 | 108 | 88   | 119 |     |    |             |    |    |    |    |    |    |    |    |    |    |    |    |    |    |    |    |    |    |    |    |    |    |    |    |    |    |    |    |    |    |    |    |    |    |    |    |    |    |    |    |    |    |    |    |    |    |    |    |    |    |    |    |    |    |    |    |    |    |    |    |    |    |    |    |    |    |    |    |    |    |    |    |    |    |    |    |    |    |    |    |    |    |    |    |    |    |    |    |    |    |    |    |    |    |    |    |    |    |    |    |    |    |    |    |    |    |    |    |    |    |    |    |    |    |    |    |    |    |    |    |    |    |    |    |    |    |    |    |    |    |    |    |    |    |    |    |    |    |    |    |    |    |    |    |    |    |    |    |    |    |    |    |    |    |    |    |    |    |    |    |    |    |    |    |    |    |    |    |    |    |    |    |    |    |    |    |    |    |    |    |    |    |    |    |    |    |    |    |    |    |    |    |    |    |    |    |    |    |    |    |    |    |    |    |    |    |    |    |    |    |    |    |    |    |    |    |    |    |    |    |    |    |    |    |    |    |    |    |    |    |    |    |    |    |    |    |    |    |    |    |    |    |    |    |    |    |    |    |    |    |    |    |    |    |    |    |    |    |    |    |    |    |    |    |    |    |    |    |    |    |    |    |    |    |    |    |    |    |    |    |    |    |    |    |    |    |    |    |    |    |    |    |    |    |    |    |    |    |    |    |    |    |    |    |    |    |    |    |    |    |    |    |    |    |    |    |    |    |    |    |    |    |    |    |    |    |    |    |    |    |    |    |    |    |    |    |    |    |    |    |    |    |    |    |    |    |    |    |    |    |    |    |    |    |    |    |    |    |    |    |    |    |    |    |    |    |    |    |    |    |    |    |    |    |    |    |    |    |    |    |    |    |    |    |    |    |    |    |    |    |    |    |    |    |    |    |    |    |    |    |    |    |    |    |    |    |    |    |    |    |    |    |    |    |    |    |    |    |    |    |    |    |    |    |    |    |    |    |    |    |    |    |    |    |    |    |    |    |    |    |    |    |    |    |    |    |    |    |    |    |    |    |    |    |    |    |    |    |    |    |    |    |    |    |    |    |    |    |    |    |    |    |    |    |    |    |    |    |    |    |    |    |    |    |    |    |    |    |    |    |    |    |    |    |    |    |    |    |    |    |    |    |    |    |    |    |    |    |    |    |    |    |    |    |    |    |    |    |    |    |    |    |    |    |    |    |    |    |    |    |    |    |    |    |    |    |    |    |    |    |    |    |    |    |    |    |    |    |    |   |
|                     | normal. | CNN.     | 00  | -10 | -48 | 87  | -89                                                 | 05   | 00    | 81       | 18                                                        | -41  | 00   | 83   | 00                                                  | 68       | 158  | 143  | 163                                                 | 44   | 00    | 177      | 249                                                 | 29  | 201  | 98   | 00                                                  | 128      | -119 | -42 | 204                                                 | -111 | 00    | -188     | 261  | 21  | -329 | 155 | 00      | -188 | 261 | 21  | -329 | 155 |     |    |             |    |    |    |    |    |    |    |    |    |    |    |    |    |    |    |    |    |    |    |    |    |    |    |    |    |    |    |    |    |    |    |    |    |    |    |    |    |    |    |    |    |    |    |    |    |    |    |    |    |    |    |    |    |    |    |    |    |    |    |    |    |    |    |    |    |    |    |    |    |    |    |    |    |    |    |    |    |    |    |    |    |    |    |    |    |    |    |    |    |    |    |    |    |    |    |    |    |    |    |    |    |    |    |    |    |    |    |    |    |    |    |    |    |    |    |    |    |    |    |    |    |    |    |    |    |    |    |    |    |    |    |    |    |    |    |    |    |    |    |    |    |    |    |    |    |    |    |    |    |    |    |    |    |    |    |    |    |    |    |    |    |    |    |    |    |    |    |    |    |    |    |    |    |    |    |    |    |    |    |    |    |    |    |    |    |    |    |    |    |    |    |    |    |    |    |    |    |    |    |    |    |    |    |    |    |    |    |    |    |    |    |    |    |    |    |    |    |    |    |    |    |    |    |    |    |    |    |    |    |    |    |    |    |    |    |    |    |    |    |    |    |    |    |    |    |    |    |    |    |    |    |    |    |    |    |    |    |    |    |    |    |    |    |    |    |    |    |    |    |    |    |    |    |    |    |    |    |    |    |    |    |    |    |    |    |    |    |    |    |    |    |    |    |    |    |    |    |    |    |    |    |    |    |    |    |    |    |    |    |    |    |    |    |    |    |    |    |    |    |    |    |    |    |    |    |    |    |    |    |    |    |    |    |    |    |    |    |    |    |    |    |    |    |    |    |    |    |    |    |    |    |    |    |    |    |    |    |    |    |    |    |    |    |    |    |    |    |    |    |    |    |    |    |    |    |    |    |    |    |    |    |    |    |    |    |    |    |    |    |    |    |    |    |    |    |    |    |    |    |    |    |    |    |    |    |    |    |    |    |    |    |    |    |    |    |    |    |    |    |    |    |    |    |    |    |    |    |    |    |    |    |    |    |    |    |    |    |    |    |    |    |    |    |    |    |    |    |    |    |    |    |    |    |    |    |    |    |    |    |    |    |    |    |    |    |    |    |    |    |    |    |    |    |    |    |    |    |    |    |    |    |    |    |    |    |    |    |    |    |    |    |    |    |    |    |    |    |    |    |    |    |    |    |    |    |    |    |    |    |    |    |    |    |    |    |    |    |    |    |    |    |    |    |    |    |    |    |    |    |    |    |    |    |    |    |    |    |    |    |    |    |    |    |    |    |    |    |    |    |   |
|                     |         | Xsum     | 18  | 00  | 07  | 122 | -132                                                | 02   | -47   | 00       | 107                                                       | -180 | -02  | -49  | -187                                                | 00       | 249  | 312  | -174                                                | 106  | 33    | 00       | 64                                                  | 39  | 55   | 37   | 52                                                  | 00       | 05   | 182 | 55                                                  | 74   | -22   | 00       | -475 | -31 | -24  | -48 | 84      | 00   | 216 | 115 | 111  | 111 |     |    |             |    |    |    |    |    |    |    |    |    |    |    |    |    |    |    |    |    |    |    |    |    |    |    |    |    |    |    |    |    |    |    |    |    |    |    |    |    |    |    |    |    |    |    |    |    |    |    |    |    |    |    |    |    |    |    |    |    |    |    |    |    |    |    |    |    |    |    |    |    |    |    |    |    |    |    |    |    |    |    |    |    |    |    |    |    |    |    |    |    |    |    |    |    |    |    |    |    |    |    |    |    |    |    |    |    |    |    |    |    |    |    |    |    |    |    |    |    |    |    |    |    |    |    |    |    |    |    |    |    |    |    |    |    |    |    |    |    |    |    |    |    |    |    |    |    |    |    |    |    |    |    |    |    |    |    |    |    |    |    |    |    |    |    |    |    |    |    |    |    |    |    |    |    |    |    |    |    |    |    |    |    |    |    |    |    |    |    |    |    |    |    |    |    |    |    |    |    |    |    |    |    |    |    |    |    |    |    |    |    |    |    |    |    |    |    |    |    |    |    |    |    |    |    |    |    |    |    |    |    |    |    |    |    |    |    |    |    |    |    |    |    |    |    |    |    |    |    |    |    |    |    |    |    |    |    |    |    |    |    |    |    |    |    |    |    |    |    |    |    |    |    |    |    |    |    |    |    |    |    |    |    |    |    |    |    |    |    |    |    |    |    |    |    |    |    |    |    |    |    |    |    |    |    |    |    |    |    |    |    |    |    |    |    |    |    |    |    |    |    |    |    |    |    |    |    |    |    |    |    |    |    |    |    |    |    |    |    |    |    |    |    |    |    |    |    |    |    |    |    |    |    |    |    |    |    |    |    |    |    |    |    |    |    |    |    |    |    |    |    |    |    |    |    |    |    |    |    |    |    |    |    |    |    |    |    |    |    |    |    |    |    |    |    |    |    |    |    |    |    |    |    |    |    |    |    |    |    |    |    |    |    |    |    |    |    |    |    |    |    |    |    |    |    |    |    |    |    |    |    |    |    |    |    |    |    |    |    |    |    |    |    |    |    |    |    |    |    |    |    |    |    |    |    |    |    |    |    |    |    |    |    |    |    |    |    |    |    |    |    |    |    |    |    |    |    |    |    |    |    |    |    |    |    |    |    |    |    |    |    |    |    |    |    |    |    |    |    |    |    |    |    |    |    |    |    |    |    |    |    |    |    |    |    |    |    |    |    |    |    |    |    |    |    |    |    |    |    |    |    |    |    |    |    |    |    |    |    |    |    |    |    |    |    |    |    |    |    |    |    |   |
|                     |         | Pubm.    | 233 | 56  | 00  | 84  | 16                                                  | 78   | 67    | 74       | 00                                                        | -12  | 126  | 51   | -29                                                 | -45      | 00   | -132 | 27                                                  | -48  | 169   | -18      | 00                                                  | 104 | 45   | 45   | 27                                                  | 158      | 00   | 00  | 14                                                  | 91   | 112   | 50       | 158  | 00  | 00   | 14  | 91      | 421  | 168 | 00  | 237  | 06  | 161 |    |             |    |    |    |    |    |    |    |    |    |    |    |    |    |    |    |    |    |    |    |    |    |    |    |    |    |    |    |    |    |    |    |    |    |    |    |    |    |    |    |    |    |    |    |    |    |    |    |    |    |    |    |    |    |    |    |    |    |    |    |    |    |    |    |    |    |    |    |    |    |    |    |    |    |    |    |    |    |    |    |    |    |    |    |    |    |    |    |    |    |    |    |    |    |    |    |    |    |    |    |    |    |    |    |    |    |    |    |    |    |    |    |    |    |    |    |    |    |    |    |    |    |    |    |    |    |    |    |    |    |    |    |    |    |    |    |    |    |    |    |    |    |    |    |    |    |    |    |    |    |    |    |    |    |    |    |    |    |    |    |    |    |    |    |    |    |    |    |    |    |    |    |    |    |    |    |    |    |    |    |    |    |    |    |    |    |    |    |    |    |    |    |    |    |    |    |    |    |    |    |    |    |    |    |    |    |    |    |    |    |    |    |    |    |    |    |    |    |    |    |    |    |    |    |    |    |    |    |    |    |    |    |    |    |    |    |    |    |    |    |    |    |    |    |    |    |    |    |    |    |    |    |    |    |    |    |    |    |    |    |    |    |    |    |    |    |    |    |    |    |    |    |    |    |    |    |    |    |    |    |    |    |    |    |    |    |    |    |    |    |    |    |    |    |    |    |    |    |    |    |    |    |    |    |    |    |    |    |    |    |    |    |    |    |    |    |    |    |    |    |    |    |    |    |    |    |    |    |    |    |    |    |    |    |    |    |    |    |    |    |    |    |    |    |    |    |    |    |    |    |    |    |    |    |    |    |    |    |    |    |    |    |    |    |    |    |    |    |    |    |    |    |    |    |    |    |    |    |    |    |    |    |    |    |    |    |    |    |    |    |    |    |    |    |    |    |    |    |    |    |    |    |    |    |    |    |    |    |    |    |    |    |    |    |    |    |    |    |    |    |    |    |    |    |    |    |    |    |    |    |    |    |    |    |    |    |    |    |    |    |    |    |    |    |    |    |    |    |    |    |    |    |    |    |    |    |    |    |    |    |    |    |    |    |    |    |    |    |    |    |    |    |    |    |    |    |    |    |    |    |    |    |    |    |    |    |    |    |    |    |    |    |    |    |    |    |    |    |    |    |    |    |    |    |    |    |    |    |    |    |    |    |    |    |    |    |    |    |    |    |    |    |    |    |    |    |    |    |    |    |    |    |    |    |    |    |    |    |    |    |    |    |    |    |    |    |    |    |    |    |   |
|                     |         | Patent b | -16 | -58 | -44 | 00  | -165                                                | -44  | -41   | 81       | 88                                                        | 00   | 37   | 25   | -38                                                 | -86      | 42   | 00   | -99                                                 | -38  | 14    | -84      | -49                                                 | 00  | -46  | -35  | 36                                                  | 1        | 248  | 173 | 00                                                  | 138  | 164   | 357      | 68   | 156 | 00   | 47  | 118     | 374  | 164 | 112 | 00   | 82  | 149 |    |             |    |    |    |    |    |    |    |    |    |    |    |    |    |    |    |    |    |    |    |    |    |    |    |    |    |    |    |    |    |    |    |    |    |    |    |    |    |    |    |    |    |    |    |    |    |    |    |    |    |    |    |    |    |    |    |    |    |    |    |    |    |    |    |    |    |    |    |    |    |    |    |    |    |    |    |    |    |    |    |    |    |    |    |    |    |    |    |    |    |    |    |    |    |    |    |    |    |    |    |    |    |    |    |    |    |    |    |    |    |    |    |    |    |    |    |    |    |    |    |    |    |    |    |    |    |    |    |    |    |    |    |    |    |    |    |    |    |    |    |    |    |    |    |    |    |    |    |    |    |    |    |    |    |    |    |    |    |    |    |    |    |    |    |    |    |    |    |    |    |    |    |    |    |    |    |    |    |    |    |    |    |    |    |    |    |    |    |    |    |    |    |    |    |    |    |    |    |    |    |    |    |    |    |    |    |    |    |    |    |    |    |    |    |    |    |    |    |    |    |    |    |    |    |    |    |    |    |    |    |    |    |    |    |    |    |    |    |    |    |    |    |    |    |    |    |    |    |    |    |    |    |    |    |    |    |    |    |    |    |    |    |    |    |    |    |    |    |    |    |    |    |    |    |    |    |    |    |    |    |    |    |    |    |    |    |    |    |    |    |    |    |    |    |    |    |    |    |    |    |    |    |    |    |    |    |    |    |    |    |    |    |    |    |    |    |    |    |    |    |    |    |    |    |    |    |    |    |    |    |    |    |    |    |    |    |    |    |    |    |    |    |    |    |    |    |    |    |    |    |    |    |    |    |    |    |    |    |    |    |    |    |    |    |    |    |    |    |    |    |    |    |    |    |    |    |    |    |    |    |    |    |    |    |    |    |    |    |    |    |    |    |    |    |    |    |    |    |    |    |    |    |    |    |    |    |    |    |    |    |    |    |    |    |    |    |    |    |    |    |    |    |    |    |    |    |    |    |    |    |    |    |    |    |    |    |    |    |    |    |    |    |    |    |    |    |    |    |    |    |    |    |    |    |    |    |    |    |    |    |    |    |    |    |    |    |    |    |    |    |    |    |    |    |    |    |    |    |    |    |    |    |    |    |    |    |    |    |    |    |    |    |    |    |    |    |    |    |    |    |    |    |    |    |    |    |    |    |    |    |    |    |    |    |    |    |    |    |    |    |    |    |    |    |    |    |    |    |    |    |    |    |    |    |    |    |    |    |    |    |    |    |    |    |    |    |    |    |    |    |   |
| Red.                |         | 19       | 87  | 34  | 84  | 05  | 45                                                  | 58   | 49    | 148      | 167                                                       | 00   | 74   | -1   | -4                                                  | -44      | -112 | 00   | -46                                                 | 123  | 02    | 168      | 162                                                 | 00  | 89   | 35   | 17                                                  | 333      | 284  | 00  | 211                                                 | 468  | 174   | 434      | 293  | 00  | 274  | 478 | 189     | 84   | 140 | 00  | 323  |     |     |    |             |    |    |    |    |    |    |    |    |    |    |    |    |    |    |    |    |    |    |    |    |    |    |    |    |    |    |    |    |    |    |    |    |    |    |    |    |    |    |    |    |    |    |    |    |    |    |    |    |    |    |    |    |    |    |    |    |    |    |    |    |    |    |    |    |    |    |    |    |    |    |    |    |    |    |    |    |    |    |    |    |    |    |    |    |    |    |    |    |    |    |    |    |    |    |    |    |    |    |    |    |    |    |    |    |    |    |    |    |    |    |    |    |    |    |    |    |    |    |    |    |    |    |    |    |    |    |    |    |    |    |    |    |    |    |    |    |    |    |    |    |    |    |    |    |    |    |    |    |    |    |    |    |    |    |    |    |    |    |    |    |    |    |    |    |    |    |    |    |    |    |    |    |    |    |    |    |    |    |    |    |    |    |    |    |    |    |    |    |    |    |    |    |    |    |    |    |    |    |    |    |    |    |    |    |    |    |    |    |    |    |    |    |    |    |    |    |    |    |    |    |    |    |    |    |    |    |    |    |    |    |    |    |    |    |    |    |    |    |    |    |    |    |    |    |    |    |    |    |    |    |    |    |    |    |    |    |    |    |    |    |    |    |    |    |    |    |    |    |    |    |    |    |    |    |    |    |    |    |    |    |    |    |    |    |    |    |    |    |    |    |    |    |    |    |    |    |    |    |    |    |    |    |    |    |    |    |    |    |    |    |    |    |    |    |    |    |    |    |    |    |    |    |    |    |    |    |    |    |    |    |    |    |    |    |    |    |    |    |    |    |    |    |    |    |    |    |    |    |    |    |    |    |    |    |    |    |    |    |    |    |    |    |    |    |    |    |    |    |    |    |    |    |    |    |    |    |    |    |    |    |    |    |    |    |    |    |    |    |    |    |    |    |    |    |    |    |    |    |    |    |    |    |    |    |    |    |    |    |    |    |    |    |    |    |    |    |    |    |    |    |    |    |    |    |    |    |    |    |    |    |    |    |    |    |    |    |    |    |    |    |    |    |    |    |    |    |    |    |    |    |    |    |    |    |    |    |    |    |    |    |    |    |    |    |    |    |    |    |    |    |    |    |    |    |    |    |    |    |    |    |    |    |    |    |    |    |    |    |    |    |    |    |    |    |    |    |    |    |    |    |    |    |    |    |    |    |    |    |    |    |    |    |    |    |    |    |    |    |    |    |    |    |    |    |    |    |    |    |    |    |    |    |    |    |    |    |    |    |    |    |    |    |    |    |    |    |    |    |    |   |
| avg                 | 51      | 15       | 17  | 75  | -73 | 17  | 11                                                  | 57   | 11    | -23      | 48                                                        | 21   | -37  | -19  | -24                                                 | -143     | -12  | -48  | 64                                                  | -54  | -11   | 57       | -55                                                 | 08  | 20   | 8    | 115                                                 | 94       | 100  | 31  | 189                                                 | 20   | 115   | 94       | 100  | 31  | 189  | 277 | 57      | 84   | 147 | -24 | 117  |     |     |    |             |    |    |    |    |    |    |    |    |    |    |    |    |    |    |    |    |    |    |    |    |    |    |    |    |    |    |    |    |    |    |    |    |    |    |    |    |    |    |    |    |    |    |    |    |    |    |    |    |    |    |    |    |    |    |    |    |    |    |    |    |    |    |    |    |    |    |    |    |    |    |    |    |    |    |    |    |    |    |    |    |    |    |    |    |    |    |    |    |    |    |    |    |    |    |    |    |    |    |    |    |    |    |    |    |    |    |    |    |    |    |    |    |    |    |    |    |    |    |    |    |    |    |    |    |    |    |    |    |    |    |    |    |    |    |    |    |    |    |    |    |    |    |    |    |    |    |    |    |    |    |    |    |    |    |    |    |    |    |    |    |    |    |    |    |    |    |    |    |    |    |    |    |    |    |    |    |    |    |    |    |    |    |    |    |    |    |    |    |    |    |    |    |    |    |    |    |    |    |    |    |    |    |    |    |    |    |    |    |    |    |    |    |    |    |    |    |    |    |    |    |    |    |    |    |    |    |    |    |    |    |    |    |    |    |    |    |    |    |    |    |    |    |    |    |    |    |    |    |    |    |    |    |    |    |    |    |    |    |    |    |    |    |    |    |    |    |    |    |    |    |    |    |    |    |    |    |    |    |    |    |    |    |    |    |    |    |    |    |    |    |    |    |    |    |    |    |    |    |    |    |    |    |    |    |    |    |    |    |    |    |    |    |    |    |    |    |    |    |    |    |    |    |    |    |    |    |    |    |    |    |    |    |    |    |    |    |    |    |    |    |    |    |    |    |    |    |    |    |    |    |    |    |    |    |    |    |    |    |    |    |    |    |    |    |    |    |    |    |    |    |    |    |    |    |    |    |    |    |    |    |    |    |    |    |    |    |    |    |    |    |    |    |    |    |    |    |    |    |    |    |    |    |    |    |    |    |    |    |    |    |    |    |    |    |    |    |    |    |    |    |    |    |    |    |    |    |    |    |    |    |    |    |    |    |    |    |    |    |    |    |    |    |    |    |    |    |    |    |    |    |    |    |    |    |    |    |    |    |    |    |    |    |    |    |    |    |    |    |    |    |    |    |    |    |    |    |    |    |    |    |    |    |    |    |    |    |    |    |    |    |    |    |    |    |    |    |    |    |    |    |    |    |    |    |    |    |    |    |    |    |    |    |    |    |    |    |    |    |    |    |    |    |    |    |    |    |    |    |    |    |    |    |    |    |    |    |    |    |    |    |    |    |    |    |    |    |    |    |    |   |
| analysis aspect     |         |          |     |     |     |     | Architecture                                        |      |       |          |                                                           |      |      |      |                                                     |          |      |      |                                                     |      |       |          |                                                     |     |      |      |                                                     |          |      |     | Generation way                                      |      |       |          |      |     |      |     |         |      |     |     |      |     |     |    |             |    |    |    |    |    |    |    |    |    |    |    |    |    |    |    |    |    |    |    |    |    |    |    |    |    |    |    |    |    |    |    |    |    |    |    |    |    |    |    |    |    |    |    |    |    |    |    |    |    |    |    |    |    |    |    |    |    |    |    |    |    |    |    |    |    |    |    |    |    |    |    |    |    |    |    |    |    |    |    |    |    |    |    |    |    |    |    |    |    |    |    |    |    |    |    |    |    |    |    |    |    |    |    |    |    |    |    |    |    |    |    |    |    |    |    |    |    |    |    |    |    |    |    |    |    |    |    |    |    |    |    |    |    |    |    |    |    |    |    |    |    |    |    |    |    |    |    |    |    |    |    |    |    |    |    |    |    |    |    |    |    |    |    |    |    |    |    |    |    |    |    |    |    |    |    |    |    |    |    |    |    |    |    |    |    |    |    |    |    |    |    |    |    |    |    |    |    |    |    |    |    |    |    |    |    |    |    |    |    |    |    |    |    |    |    |    |    |    |    |    |    |    |    |    |    |    |    |    |    |    |    |    |    |    |    |    |    |    |    |    |    |    |    |    |    |    |    |    |    |    |    |    |    |    |    |    |    |    |    |    |    |    |    |    |    |    |    |    |    |    |    |    |    |    |    |    |    |    |    |    |    |    |    |    |    |    |    |    |    |    |    |    |    |    |    |    |    |    |    |    |    |    |    |    |    |    |    |    |    |    |    |    |    |    |    |    |    |    |    |    |    |    |    |    |    |    |    |    |    |    |    |    |    |    |    |    |    |    |    |    |    |    |    |    |    |    |    |    |    |    |    |    |    |    |    |    |    |    |    |    |    |    |    |    |    |    |    |    |    |    |    |    |    |    |    |    |    |    |    |    |    |    |    |    |    |    |    |    |    |    |    |    |    |    |    |    |    |    |    |    |    |    |    |    |    |    |    |    |    |    |    |    |    |    |    |    |    |    |    |    |    |    |    |    |    |    |    |    |    |    |    |    |    |    |    |    |    |    |    |    |    |    |    |    |    |    |    |    |    |    |    |    |    |    |    |    |    |    |    |    |    |    |    |    |    |    |    |    |    |    |    |    |    |    |    |    |    |    |    |    |    |    |    |    |    |    |    |    |    |    |    |    |    |    |    |    |    |    |    |    |    |    |    |    |    |    |    |    |    |    |    |    |    |    |    |    |    |    |    |    |    |    |    |    |    |    |    |    |    |    |    |    |    |    |    |    |    |    |    |    |    |    |    |    |    |    |    |    |    |   |
| model type          |         |          |     |     |     |     | EXT                                                 |      |       |          |                                                           |      |      |      |                                                     |          |      |      |                                                     |      |       |          |                                                     |     |      |      |                                                     |          |      |     | LSTM                                                |      |       |          |      |     |      |     | BERTSUM |      |     |     |      |     |     |    | Transformer |    |    |    |    |    |    |    |    |    |    |    |    |    |    |    |    |    |    |    |    |    |    |    |    |    |    |    |    |    |    |    |    |    |    |    |    |    |    |    |    |    |    |    |    |    |    |    |    |    |    |    |    |    |    |    |    |    |    |    |    |    |    |    |    |    |    |    |    |    |    |    |    |    |    |    |    |    |    |    |    |    |    |    |    |    |    |    |    |    |    |    |    |    |    |    |    |    |    |    |    |    |    |    |    |    |    |    |    |    |    |    |    |    |    |    |    |    |    |    |    |    |    |    |    |    |    |    |    |    |    |    |    |    |    |    |    |    |    |    |    |    |    |    |    |    |    |    |    |    |    |    |    |    |    |    |    |    |    |    |    |    |    |    |    |    |    |    |    |    |    |    |    |    |    |    |    |    |    |    |    |    |    |    |    |    |    |    |    |    |    |    |    |    |    |    |    |    |    |    |    |    |    |    |    |    |    |    |    |    |    |    |    |    |    |    |    |    |    |    |    |    |    |    |    |    |    |    |    |    |    |    |    |    |    |    |    |    |    |    |    |    |    |    |    |    |    |    |    |    |    |    |    |    |    |    |    |    |    |    |    |    |    |    |    |    |    |    |    |    |    |    |    |    |    |    |    |    |    |    |    |    |    |    |    |    |    |    |    |    |    |    |    |    |    |    |    |    |    |    |    |    |    |    |    |    |    |    |    |    |    |    |    |    |    |    |    |    |    |    |    |    |    |    |    |    |    |    |    |    |    |    |    |    |    |    |    |    |    |    |    |    |    |    |    |    |    |    |    |    |    |    |    |    |    |    |    |    |    |    |    |    |    |    |    |    |    |    |    |    |    |    |    |    |    |    |    |    |    |    |    |    |    |    |    |    |    |    |    |    |    |    |    |    |    |    |    |    |    |    |    |    |    |    |    |    |    |    |    |    |    |    |    |    |    |    |    |    |    |    |    |    |    |    |    |    |    |    |    |    |    |    |    |    |    |    |    |    |    |    |    |    |    |    |    |    |    |    |    |    |    |    |    |    |    |    |    |    |    |    |    |    |    |    |    |    |    |    |    |    |    |    |    |    |    |    |    |    |    |    |    |    |    |    |    |    |    |    |    |    |    |    |    |    |    |    |    |    |    |    |    |    |    |    |    |    |    |    |    |    |    |    |    |    |    |    |    |    |    |    |    |    |    |    |    |    |    |    |    |    |    |    |    |    |    |    |    |    |    |    |    |    |    |    |    |    |    |    |    |    |   |
| compare models      |         |          |     |     |     |     | Trans <sub>non</sub> vs. LSTM <sub>non</sub>        |      |       |          | Trans <sub>auto</sub> vs. Trans <sub>non</sub>            |      |      |      | BERT <sub>match</sub> vs. BERT <sub>non</sub>       |          |      |      | BERT <sub>non</sub> vs. Trans <sub>non</sub>        |      |       |          | LSTM <sub>non</sub> vs. L2L                         |     |      |      | Trans <sub>non</sub> vs. T2T                        |          |      |     | BERT <sub>non</sub> vs. BE2T                        |      |       |          |      |     |      |     |         |      |     |     |      |     |     |    |             |    |    |    |    |    |    |    |    |    |    |    |    |    |    |    |    |    |    |    |    |    |    |    |    |    |    |    |    |    |    |    |    |    |    |    |    |    |    |    |    |    |    |    |    |    |    |    |    |    |    |    |    |    |    |    |    |    |    |    |    |    |    |    |    |    |    |    |    |    |    |    |    |    |    |    |    |    |    |    |    |    |    |    |    |    |    |    |    |    |    |    |    |    |    |    |    |    |    |    |    |    |    |    |    |    |    |    |    |    |    |    |    |    |    |    |    |    |    |    |    |    |    |    |    |    |    |    |    |    |    |    |    |    |    |    |    |    |    |    |    |    |    |    |    |    |    |    |    |    |    |    |    |    |    |    |    |    |    |    |    |    |    |    |    |    |    |    |    |    |    |    |    |    |    |    |    |    |    |    |    |    |    |    |    |    |    |    |    |    |    |    |    |    |    |    |    |    |    |    |    |    |    |    |    |    |    |    |    |    |    |    |    |    |    |    |    |    |    |    |    |    |    |    |    |    |    |    |    |    |    |    |    |    |    |    |    |    |    |    |    |    |    |    |    |    |    |    |    |    |    |    |    |    |    |    |    |    |    |    |    |    |    |    |    |    |    |    |    |    |    |    |    |    |    |    |    |    |    |    |    |    |    |    |    |    |    |    |    |    |    |    |    |    |    |    |    |    |    |    |    |    |    |    |    |    |    |    |    |    |    |    |    |    |    |    |    |    |    |    |    |    |    |    |    |    |    |    |    |    |    |    |    |    |    |    |    |    |    |    |    |    |    |    |    |    |    |    |    |    |    |    |    |    |    |    |    |    |    |    |    |    |    |    |    |    |    |    |    |    |    |    |    |    |    |    |    |    |    |    |    |    |    |    |    |    |    |    |    |    |    |    |    |    |    |    |    |    |    |    |    |    |    |    |    |    |    |    |    |    |    |    |    |    |    |    |    |    |    |    |    |    |    |    |    |    |    |    |    |    |    |    |    |    |    |    |    |    |    |    |    |    |    |    |    |    |    |    |    |    |    |    |    |    |    |    |    |    |    |    |    |    |    |    |    |    |    |    |    |    |    |    |    |    |    |    |    |    |    |    |    |    |    |    |    |    |    |    |    |    |    |    |    |    |    |    |    |    |    |    |    |    |    |    |    |    |    |    |    |    |    |    |    |    |    |    |    |    |    |    |    |    |    |    |    |    |    |    |    |    |    |    |    |    |    |    |    |    |    |    |    |    |    |    |    |    |    |    |    |    |   |
| holistic analysis   |         |          |     |     |     |     | stiff.: 28.02 vs. 28.51<br>stable.: 99.05 vs. 87.00 |      |       |          | stiff.: 28.51 vs. 28.02<br>stable.: 88.71 vs. 99.05       |      |      |      | stiff.: 32.27 vs. 28.98<br>stable.: 91.98 vs. 88.93 |          |      |      | stiff.: 28.98 vs. 28.02<br>stable.: 88.93 vs. 99.05 |      |       |          | stiff.: 28.51 vs. 18.03<br>stable.: 87.00 vs. 66.93 |     |      |      | stiff.: 28.02 vs. 19.79<br>stable.: 99.05 vs. 62.12 |          |      |     | stiff.: 28.98 vs. 23.49<br>stable.: 88.93 vs. 62.93 |      |       |          |      |     |      |     |         |      |     |     |      |     |     |    |             |    |    |    |    |    |    |    |    |    |    |    |    |    |    |    |    |    |    |    |    |    |    |    |    |    |    |    |    |    |    |    |    |    |    |    |    |    |    |    |    |    |    |    |    |    |    |    |    |    |    |    |    |    |    |    |    |    |    |    |    |    |    |    |    |    |    |    |    |    |    |    |    |    |    |    |    |    |    |    |    |    |    |    |    |    |    |    |    |    |    |    |    |    |    |    |    |    |    |    |    |    |    |    |    |    |    |    |    |    |    |    |    |    |    |    |    |    |    |    |    |    |    |    |    |    |    |    |    |    |    |    |    |    |    |    |    |    |    |    |    |    |    |    |    |    |    |    |    |    |    |    |    |    |    |    |    |    |    |    |    |    |    |    |    |    |    |    |    |    |    |    |    |    |    |    |    |    |    |    |    |    |    |    |    |    |    |    |    |    |    |    |    |    |    |    |    |    |    |    |    |    |    |    |    |    |    |    |    |    |    |    |    |    |    |    |    |    |    |    |    |    |    |    |    |    |    |    |    |    |    |    |    |    |    |    |    |    |    |    |    |    |    |    |    |    |    |    |    |    |    |    |    |    |    |    |    |    |    |    |    |    |    |    |    |    |    |    |    |    |    |    |    |    |    |    |    |    |    |    |    |    |    |    |    |    |    |    |    |    |    |    |    |    |    |    |    |    |    |    |    |    |    |    |    |    |    |    |    |    |    |    |    |    |    |    |    |    |    |    |    |    |    |    |    |    |    |    |    |    |    |    |    |    |    |    |    |    |    |    |    |    |    |    |    |    |    |    |    |    |    |    |    |    |    |    |    |    |    |    |    |    |    |    |    |    |    |    |    |    |    |    |    |    |    |    |    |    |    |    |    |    |    |    |    |    |    |    |    |    |    |    |    |    |    |    |    |    |    |    |    |    |    |    |    |    |    |    |    |    |    |    |    |    |    |    |    |    |    |    |    |    |    |    |    |    |    |    |    |    |    |    |    |    |    |    |    |    |    |    |    |    |    |    |    |    |    |    |    |    |    |    |    |    |    |    |    |    |    |    |    |    |    |    |    |    |    |    |    |    |    |    |    |    |    |    |    |    |    |    |    |    |    |    |    |    |    |    |    |    |    |    |    |    |    |    |    |    |    |    |    |    |    |    |    |    |    |    |    |    |    |    |    |    |    |    |    |    |    |    |    |    |    |    |    |    |    |    |    |    |    |    |    |    |    |    |    |    |    |    |    |    |    |    |    |    |    |    |    |    |   |
| fine-grain analysis |         |          |     |     |     |     | CNN.                                                | Xsum | Pubm. | Patent b | Red.                                                      | avg  | CNN. | Xsum | Pubm.                                               | Patent b | Red. | avg  | CNN.                                                | Xsum | Pubm. | Patent b | Red.                                                | avg | CNN. | Xsum | Pubm.                                               | Patent b | Red. | avg | CNN.                                                | Xsum | Pubm. | Patent b | Red. | avg |      |     |         |      |     |     |      |     |     |    |             |    |    |    |    |    |    |    |    |    |    |    |    |    |    |    |    |    |    |    |    |    |    |    |    |    |    |    |    |    |    |    |    |    |    |    |    |    |    |    |    |    |    |    |    |    |    |    |    |    |    |    |    |    |    |    |    |    |    |    |    |    |    |    |    |    |    |    |    |    |    |    |    |    |    |    |    |    |    |    |    |    |    |    |    |    |    |    |    |    |    |    |    |    |    |    |    |    |    |    |    |    |    |    |    |    |    |    |    |    |    |    |    |    |    |    |    |    |    |    |    |    |    |    |    |    |    |    |    |    |    |    |    |    |    |    |    |    |    |    |    |    |    |    |    |    |    |    |    |    |    |    |    |    |    |    |    |    |    |    |    |    |    |    |    |    |    |    |    |    |    |    |    |    |    |    |    |    |    |    |    |    |    |    |    |    |    |    |    |    |    |    |    |    |    |    |    |    |    |    |    |    |    |    |    |    |    |    |    |    |    |    |    |    |    |    |    |    |    |    |    |    |    |    |    |    |    |    |    |    |    |    |    |    |    |    |    |    |    |    |    |    |    |    |    |    |    |    |    |    |    |    |    |    |    |    |    |    |    |    |    |    |    |    |    |    |    |    |    |    |    |    |    |    |    |    |    |    |    |    |    |    |    |    |    |    |    |    |    |    |    |    |    |    |    |    |    |    |    |    |    |    |    |    |    |    |    |    |    |    |    |    |    |    |    |    |    |    |    |    |    |    |    |    |    |    |    |    |    |    |    |    |    |    |    |    |    |    |    |    |    |    |    |    |    |    |    |    |    |    |    |    |    |    |    |    |    |    |    |    |    |    |    |    |    |    |    |    |    |    |    |    |    |    |    |    |    |    |    |    |    |    |    |    |    |    |    |    |    |    |    |    |    |    |    |    |    |    |    |    |    |    |    |    |    |    |    |    |    |    |    |    |    |    |    |    |    |    |    |    |    |    |    |    |    |    |    |    |    |    |    |    |    |    |    |    |    |    |    |    |    |    |    |    |    |    |    |    |    |    |    |    |    |    |    |    |    |    |    |    |    |    |    |    |    |    |    |    |    |    |    |    |    |    |    |    |    |    |    |    |    |    |    |    |    |    |    |    |    |    |    |    |    |    |    |    |    |    |    |    |    |    |    |    |    |    |    |    |    |    |    |    |    |    |    |    |    |    |    |    |    |    |    |    |    |    |    |    |    |    |    |    |    |    |    |    |    |    |    |    |    |    |    |    |    |    |    |    |    |    |   |
| ROUGE               | origin  | CNN.     | 45  | 08  | -18 | 48  | 138                                                 | 26   | 05    | 84       | 06                                                        | 31   | 123  | -16  | 16                                                  | 41       | 45   | 38   | 47                                                  | 34   | 18    | 12       | 03                                                  | 08  | -103 | -13  | 86                                                  | 61       | 132  | 49  | 20                                                  | 57   | 09    | 31       | -11  | 103 | 23   | 12  | -20     | -18  | -17 | 41  |      |     |     |    |             |    |    |    |    |    |    |    |    |    |    |    |    |    |    |    |    |    |    |    |    |    |    |    |    |    |    |    |    |    |    |    |    |    |    |    |    |    |    |    |    |    |    |    |    |    |    |    |    |    |    |    |    |    |    |    |    |    |    |    |    |    |    |    |    |    |    |    |    |    |    |    |    |    |    |    |    |    |    |    |    |    |    |    |    |    |    |    |    |    |    |    |    |    |    |    |    |    |    |    |    |    |    |    |    |    |    |    |    |    |    |    |    |    |    |    |    |    |    |    |    |    |    |    |    |    |    |    |    |    |    |    |    |    |    |    |    |    |    |    |    |    |    |    |    |    |    |    |    |    |    |    |    |    |    |    |    |    |    |    |    |    |    |    |    |    |    |    |    |    |    |    |    |    |    |    |    |    |    |    |    |    |    |    |    |    |    |    |    |    |    |    |    |    |    |    |    |    |    |    |    |    |    |    |    |    |    |    |    |    |    |    |    |    |    |    |    |    |    |    |    |    |    |    |    |    |    |    |    |    |    |    |    |    |    |    |    |    |    |    |    |    |    |    |    |    |    |    |    |    |    |    |    |    |    |    |    |    |    |    |    |    |    |    |    |    |    |    |    |    |    |    |    |    |    |    |    |    |    |    |    |    |    |    |    |    |    |    |    |    |    |    |    |    |    |    |    |    |    |    |    |    |    |    |    |    |    |    |    |    |    |    |    |    |    |    |    |    |    |    |    |    |    |    |    |    |    |    |    |    |    |    |    |    |    |    |    |    |    |    |    |    |    |    |    |    |    |    |    |    |    |    |    |    |    |    |    |    |    |    |    |    |    |    |    |    |    |    |    |    |    |    |    |    |    |    |    |    |    |    |    |    |    |    |    |    |    |    |    |    |    |    |    |    |    |    |    |    |    |    |    |    |    |    |    |    |    |    |    |    |    |    |    |    |    |    |    |    |    |    |    |    |    |    |    |    |    |    |    |    |    |    |    |    |    |    |    |    |    |    |    |    |    |    |    |    |    |    |    |    |    |    |    |    |    |    |    |    |    |    |    |    |    |    |    |    |    |    |    |    |    |    |    |    |    |    |    |    |    |    |    |    |    |    |    |    |    |    |    |    |    |    |    |    |    |    |    |    |    |    |    |    |    |    |    |    |    |    |    |    |    |    |    |    |    |    |    |    |    |    |    |    |    |    |    |    |    |    |    |    |    |    |    |    |    |    |    |    |    |    |    |    |    |    |    |    |    |    |    |    |   |
|                     |         | Xsum     | 32  | -38 | -25 | 42  | 28                                                  | 08   | -32   | 35       | 48                                                        | 07   | 03   | -06  | 29                                                  | 32       | 35   | 18   | 16                                                  | 57   | 34    | 10       | 61                                                  | 01  | -16  | 47   | 06                                                  | 11       | -6   | 47  | 06                                                  | 11   | -6    | 47       | 06   | 11  | -6   | 47  | 06      | 11   | -6  | 47  | 06   | 11  | -6  | 47 | 06          | 11 | -6 | 47 | 06 | 11 | -6 | 47 | 06 | 11 | -6 | 47 | 06 | 11 | -6 | 47 | 06 | 11 | -6 | 47 | 06 | 11 | -6 | 47 | 06 | 11 | -6 | 47 | 06 | 11 | -6 | 47 | 06 | 11 | -6 | 47 | 06 | 11 | -6 | 47 | 06 | 11 | -6 | 47 | 06 | 11 | -6 | 47 | 06 | 11 | -6 | 47 | 06 | 11 | -6 | 47 | 06 | 11 | -6 | 47 | 06 | 11 | -6 | 47 | 06 | 11 | -6 | 47 | 06 | 11 | -6 | 47 | 06 | 11 | -6 | 47 | 06 | 11 | -6 | 47 | 06 | 11 | -6 | 47 | 06 | 11 | -6 | 47 | 06 | 11 | -6 | 47 | 06 | 11 | -6 | 47 | 06 | 11 | -6 | 47 | 06 | 11 | -6 | 47 | 06 | 11 | -6 | 47 | 06 | 11 | -6 | 47 | 06 | 11 | -6 | 47 | 06 | 11 | -6 | 47 | 06 | 11 | -6 | 47 | 06 | 11 | -6 | 47 | 06 | 11 | -6 | 47 | 06 | 11 | -6 | 47 | 06 | 11 | -6 | 47 | 06 | 11 | -6 | 47 | 06 | 11 | -6 | 47 | 06 | 11 | -6 | 47 | 06 | 11 | -6 | 47 | 06 | 11 | -6 | 47 | 06 | 11 | -6 | 47 | 06 | 11 | -6 | 47 | 06 | 11 | -6 | 47 | 06 | 11 | -6 | 47 | 06 | 11 | -6 | 47 | 06 | 11 | -6 | 47 | 06 | 11 | -6 | 47 | 06 | 11 | -6 | 47 | 06 | 11 | -6 | 47 | 06 | 11 | -6 | 47 | 06 | 11 | -6 | 47 | 06 | 11 | -6 | 47 | 06 | 11 | -6 | 47 | 06 | 11 | -6 | 47 | 06 | 11 | -6 | 47 | 06 | 11 | -6 | 47 | 06 | 11 | -6 | 47 | 06 | 11 | -6 | 47 | 06 | 11 | -6 | 47 | 06 | 11 | -6 | 47 | 06 | 11 | -6 | 47 | 06 | 11 | -6 | 47 | 06 | 11 | -6 | 47 | 06 | 11 | -6 | 47 | 06 | 11 | -6 | 47 | 06 | 11 | -6 | 47 | 06 | 11 | -6 | 47 | 06 | 11 | -6 | 47 | 06 | 11 | -6 | 47 | 06 | 11 | -6 | 47 | 06 | 11 | -6 | 47 | 06 | 11 | -6 | 47 | 06 | 11 | -6 | 47 | 06 | 11 | -6 | 47 | 06 | 11 | -6 | 47 | 06 | 11 | -6 | 47 | 06 | 11 | -6 | 47 | 06 | 11 | -6 | 47 | 06 | 11 | -6 | 47 | 06 | 11 | -6 | 47 | 06 | 11 | -6 | 47 | 06 | 11 | -6 | 47 | 06 | 11 | -6 | 47 | 06 | 11 | -6 | 47 | 06 | 11 | -6 | 47 | 06 | 11 | -6 | 47 | 06 | 11 | -6 | 47 | 06 | 11 | -6 | 47 | 06 | 11 | -6 | 47 | 06 | 11 | -6 | 47 | 06 | 11 | -6 | 47 | 06 | 11 | -6 | 47 | 06 | 11 | -6 | 47 | 06 | 11 | -6 | 47 | 06 | 11 | -6 | 47 | 06 | 11 | -6 | 47 | 06 | 11 | -6 | 47 | 06 | 11 | -6 | 47 | 06 | 11 | -6 | 47 | 06 | 11 | -6 | 47 | 06 | 11 | -6 | 47 | 06 | 11 | -6 | 47 | 06 | 11 | -6 | 47 | 06 | 11 | -6 | 47 | 06 | 11 | -6 | 47 | 06 | 11 | -6 | 47 | 06 | 11 | -6 | 47 | 06 | 11 | -6 | 47 | 06 | 11 | -6 | 47 | 06 | 11 | -6 | 47 | 06 | 11 | -6 | 47 | 06 | 11 | -6 | 47 | 06 | 11 | -6 | 47 | 06 | 11 | -6 | 47 | 06 | 11 | -6 | 47 | 06 | 11 | -6 | 47 | 06 | 11 | -6 | 47 | 06 | 11 | -6 | 47 | 06 | 11 | -6 | 47 | 06 | 11 | -6 | 47 | 06 | 11 | -6 | 47 | 06 | 11 | -6 | 47 | 06 | 11 | -6 | 47 | 06 | 11 | -6 | 47 | 06 | 11 | -6 | 47 | 06 | 11 | -6 | 47 | 06 | 11 | -6 | 47 | 06 | 11 | -6 | 47 | 06 | 11 | -6 | 47 | 06 | 11 | -6 | 47 | 06 | 11 | -6 | 47 | 06 | 11 | -6 | 47 | 06 | 11 | -6 | 47 | 06 | 11 | -6 | 47 | 06 | 11 | -6 | 47 | 06 | 11 | -6 | 47 | 06 | 11 | -6 | 47 | 06 | 11 | - |

for natural language generation, translation, and comprehension. *arXiv preprint arXiv:1910.13461*.

Yang Liu and Mirella Lapata. 2019. Text summarization with pretrained encoders. In *Proceedings of the 2019 Conference on Empirical Methods in Natural Language Processing and the 9th International Joint Conference on Natural Language Processing (EMNLP-IJCNLP)*, pages 3721–3731.

Ramesh Nallapati, Bowen Zhou, Cicero dos Santos, Çağlar Gulçehre, and Bing Xiang. 2016. Abstractive text summarization using sequence-to-sequence rnns and beyond. *CoNLL 2016*, page 280.

Shashi Narayan, Shay B Cohen, and Mirella Lapata. 2018. Don’t give me the details, just the summary! topic-aware convolutional neural networks for extreme summarization. In *Proceedings of the 2018 Conference on Empirical Methods in Natural Language Processing*, pages 1797–1807.

Myle Ott, Sergey Edunov, Alexei Baevski, Angela Fan, Sam Gross, Nathan Ng, David Grangier, and Michael Auli. 2019. fairseq: A fast, extensible toolkit for sequence modeling. In *Proceedings of NAACL-HLT 2019: Demonstrations*.

Abigail See, Peter J Liu, and Christopher D Manning. 2017. Get to the point: Summarization with pointer-generator networks. In *Proceedings of the 55th Annual Meeting of the Association for Computational Linguistics (Volume 1: Long Papers)*, volume 1, pages 1073–1083.

Eva Sharma, Chen Li, and Lu Wang. 2019. Bigpatent: A large-scale dataset for abstractive and coherent summarization. *arXiv preprint arXiv:1906.03741*.

Ashish Vaswani, Noam Shazeer, Niki Parmar, Jakob Uszkoreit, Llion Jones, Aidan N Gomez, Łukasz Kaiser, and Illia Polosukhin. 2017. Attention is all you need. In *Advances in Neural Information Processing Systems*, pages 5998–6008.

Ming Zhong, Pengfei Liu, Yiran Chen, Danqing Wang, Xipeng Qiu, and Xuanjing Huang. 2020. [Extractive summarization as text matching](#).

Ming Zhong, Pengfei Liu, Danqing Wang, Xipeng Qiu, and Xuan-Jing Huang. 2019. Searching for effective neural extractive summarization: What works and what’s next. In *Proceedings of the 57th Annual Meeting of the Association for Computational Linguistics*, pages 1049–1058.
